# Supplementary material for: Oxidative metabolisms catalyzed Earth’s oxygenation
Source: PubMed Central journal article supplement (PMC8921266; doi:10.1038/s41467-022-28996-0), 2022-03-14
Supplement: 41467_2022_28996_MOESM1_ESM.pdf [file 41467_2022_28996_MOESM1_ESM.pdf]

# Oxidative metabolisms catalyzed Earth's oxygenation – Supplementary Information –

Haitao Shang,<sup>1,2,\*</sup> Daniel H. Rothman,<sup>1,2</sup> Gregory P. Fournier<sup>2</sup>

<sup>1</sup>Lorenz Center, <sup>2</sup>Department of Earth, Atmospheric, and Planetary Sciences,  
Massachusetts Institute of Technology, Cambridge, MA 02139, USA

\*To whom correspondence should be addressed; E-mail: [htshang.research@gmail.com](mailto:htshang.research@gmail.com).

Table S1: List of Ribosomal Proteins

| Large Subunit (50 S) | Small Subunit (30 S) |
|----------------------|----------------------|
| L1                   | S2                   |
| L2                   | S3                   |
| L3                   | S4                   |
| L4                   | S5                   |
| L5                   | S7                   |
| L6                   | S8                   |
| L10                  | S9                   |
| L13                  | S10                  |
| L14                  | S11                  |
| L15                  | S12                  |
| L18                  | S13                  |
| L22                  | S14                  |
| L23                  | S15                  |
| L24                  | S17                  |
| L29                  | S19                  |

Table S2: Information of Taxa

| Taxon Name                                                                 | Database | Genome ID                                                                                                                   |
|----------------------------------------------------------------------------|----------|-----------------------------------------------------------------------------------------------------------------------------|
| 1. <i>Rickettsia typhi</i> str. B9991CWPP                                  | PATRIC   | 1003202.3 [ <a href="https://www.patricbrc.org/view/Genome/1003202.3">https://www.patricbrc.org/view/Genome/1003202.3</a> ] |
| 2. <i>Parvularcula bermudensis</i> HTCC2503                                | PATRIC   | 314260.8 [ <a href="https://www.patricbrc.org/view/Genome/314260.8">https://www.patricbrc.org/view/Genome/314260.8</a> ]    |
| 3. <i>Pelagibaca bermudensis</i> HTCC2601                                  | PATRIC   | 314265.3 [ <a href="https://www.patricbrc.org/view/Genome/314265.3">https://www.patricbrc.org/view/Genome/314265.3</a> ]    |
| 4. <i>Rhodospirillum centenum</i> SW                                       | PATRIC   | 414684.5 [ <a href="https://www.patricbrc.org/view/Genome/414684.5">https://www.patricbrc.org/view/Genome/414684.5</a> ]    |
| 5. <i>Methylobacterium radiotolerans</i> JCM 2831                          | PATRIC   | 426355.14 [ <a href="https://www.patricbrc.org/view/Genome/426355.14">https://www.patricbrc.org/view/Genome/426355.14</a> ] |
| 6. <i>Caulobacter segnis</i> ATCC 21756                                    | PATRIC   | 509190.6 [ <a href="https://www.patricbrc.org/view/Genome/509190.6">https://www.patricbrc.org/view/Genome/509190.6</a> ]    |
| 7. <i>Candidatus Pelagibacter ubique</i> HTCC1062                          | PATRIC   | 335992.9 [ <a href="https://www.patricbrc.org/view/Genome/335992.9">https://www.patricbrc.org/view/Genome/335992.9</a> ]    |
| 8. <i>Pedobacter kyunghensis</i> KACC 16221                                | PATRIC   | 1069985.4 [ <a href="https://www.patricbrc.org/view/Genome/1069985.4">https://www.patricbrc.org/view/Genome/1069985.4</a> ] |
| 9. <i>Blattabacterium</i> sp. ( <i>Cryptocercus punctulatus</i> ) str. Cpu | PATRIC   | 1075399.3 [ <a href="https://www.patricbrc.org/view/Genome/1075399.3">https://www.patricbrc.org/view/Genome/1075399.3</a> ] |
| 10. <i>Formosa</i> sp. AK20                                                | PATRIC   | 1137281.3 [ <a href="https://www.patricbrc.org/view/Genome/1137281.3">https://www.patricbrc.org/view/Genome/1137281.3</a> ] |
| 11. <i>Mangrovimonas yunxiaonensis</i> str. LY01                           | PATRIC   | 1197477.3 [ <a href="https://www.patricbrc.org/view/Genome/1197477.3">https://www.patricbrc.org/view/Genome/1197477.3</a> ] |
| 12. <i>Cellulophaga geojensis</i> KL-A                                     | PATRIC   | 1328323.3 [ <a href="https://www.patricbrc.org/view/Genome/1328323.3">https://www.patricbrc.org/view/Genome/1328323.3</a> ] |
| 13. <i>Cardinium endosymbiont</i> cBtQ1 of <i>Bemisia tabaci</i>           | PATRIC   | 1354314.3 [ <a href="https://www.patricbrc.org/view/Genome/1354314.3">https://www.patricbrc.org/view/Genome/1354314.3</a> ] |
| 14. <i>Elizabethkingia meningoseptica</i> 502                              | PATRIC   | 1355388.3 [ <a href="https://www.patricbrc.org/view/Genome/1355388.3">https://www.patricbrc.org/view/Genome/1355388.3</a> ] |
| 15. <i>Rikenellaceae bacterium</i> M3                                      | PATRIC   | 1433126.3 [ <a href="https://www.patricbrc.org/view/Genome/1433126.3">https://www.patricbrc.org/view/Genome/1433126.3</a> ] |
| 16. <i>Flavobacterium aquatile</i> LMG 4008                                | PATRIC   | 1453498.8 [ <a href="https://www.patricbrc.org/view/Genome/1453498.8">https://www.patricbrc.org/view/Genome/1453498.8</a> ] |
| 17. <i>Schleiferia thermophila</i> str. Yellowstone                        | PATRIC   | 1453500.3 [ <a href="https://www.patricbrc.org/view/Genome/1453500.3">https://www.patricbrc.org/view/Genome/1453500.3</a> ] |
| 18. <i>Chryseobacterium antarcticum</i>                                    | PATRIC   | 266748.6 [ <a href="https://www.patricbrc.org/view/Genome/266748.6">https://www.patricbrc.org/view/Genome/266748.6</a> ]    |
| 19. <i>Capnocytophaga canimorsus</i> str. CcD38                            | PATRIC   | 28188.6 [ <a href="https://www.patricbrc.org/view/Genome/28188.6">https://www.patricbrc.org/view/Genome/28188.6</a> ]       |
| 20. <i>Robiginitalea biformata</i> HTCC2501                                | PATRIC   | 313596.4 [ <a href="https://www.patricbrc.org/view/Genome/313596.4">https://www.patricbrc.org/view/Genome/313596.4</a> ]    |
| 21. <i>Porphyromonas canoris</i> COT-108 <sub>O</sub> H1224                | PATRIC   | 36875.4 [ <a href="https://www.patricbrc.org/view/Genome/36875.4">https://www.patricbrc.org/view/Genome/36875.4</a> ]       |
| 22. <i>Kordia algicida</i> OT-1                                            | PATRIC   | 391587.3 [ <a href="https://www.patricbrc.org/view/Genome/391587.3">https://www.patricbrc.org/view/Genome/391587.3</a> ]    |
| 23. <i>Epilithonimonas lactis</i> str. LMG 24401                           | PATRIC   | 421072.8 [ <a href="https://www.patricbrc.org/view/Genome/421072.8">https://www.patricbrc.org/view/Genome/421072.8</a> ]    |
| 24. <i>Chryseobacterium luteum</i> str. DSM 18605                          | PATRIC   | 421531.5 [ <a href="https://www.patricbrc.org/view/Genome/421531.5">https://www.patricbrc.org/view/Genome/421531.5</a> ]    |
| 25. <i>Parabacteroides distasonis</i> ATCC 8503                            | PATRIC   | 435591.13 [ <a href="https://www.patricbrc.org/view/Genome/435591.13">https://www.patricbrc.org/view/Genome/435591.13</a> ] |
| 26. <i>Bacteroides fragilis</i> 3 <sub>11</sub> 2                          | PATRIC   | 457424.5 [ <a href="https://www.patricbrc.org/view/Genome/457424.5">https://www.patricbrc.org/view/Genome/457424.5</a> ]    |
| 27. <i>Spirosoma linguale</i> DSM 74                                       | PATRIC   | 504472.7 [ <a href="https://www.patricbrc.org/view/Genome/504472.7">https://www.patricbrc.org/view/Genome/504472.7</a> ]    |
| 28. <i>Nonlabens dokdonensis</i> DSW-6                                     | PATRIC   | 592029.3 [ <a href="https://www.patricbrc.org/view/Genome/592029.3">https://www.patricbrc.org/view/Genome/592029.3</a> ]    |
| 29. <i>Marivirga tractuosa</i> DSM 4126                                    | PATRIC   | 643867.3 [ <a href="https://www.patricbrc.org/view/Genome/643867.3">https://www.patricbrc.org/view/Genome/643867.3</a> ]    |
| 30. <i>Paludibacter propionigenes</i> WB4                                  | PATRIC   | 694427.4 [ <a href="https://www.patricbrc.org/view/Genome/694427.4">https://www.patricbrc.org/view/Genome/694427.4</a> ]    |
| 31. <i>Paraprevotella clara</i> YIT 11840                                  | PATRIC   | 762968.3 [ <a href="https://www.patricbrc.org/view/Genome/762968.3">https://www.patricbrc.org/view/Genome/762968.3</a> ]    |
| 32. <i>Weeksella virosa</i> DSM 16922                                      | PATRIC   | 865938.3 [ <a href="https://www.patricbrc.org/view/Genome/865938.3">https://www.patricbrc.org/view/Genome/865938.3</a> ]    |
| 33. <i>Ornithobacterium rhinotracheale</i> DSM 15997                       | PATRIC   | 867902.3 [ <a href="https://www.patricbrc.org/view/Genome/867902.3">https://www.patricbrc.org/view/Genome/867902.3</a> ]    |
| 34. <i>Niabella soli</i> DSM 19437                                         | PATRIC   | 929713.3 [ <a href="https://www.patricbrc.org/view/Genome/929713.3">https://www.patricbrc.org/view/Genome/929713.3</a> ]    |
| 35. <i>Prevotella nigrescens</i> ATCC 33563                                | PATRIC   | 997352.4 [ <a href="https://www.patricbrc.org/view/Genome/997352.4">https://www.patricbrc.org/view/Genome/997352.4</a> ]    |
| 36. <i>Fluviicola taffensis</i> DSM 16823                                  | PATRIC   | 755732.3 [ <a href="https://www.patricbrc.org/view/Genome/755732.3">https://www.patricbrc.org/view/Genome/755732.3</a> ]    |
| 37. <i>Owenweeksia hongkongensis</i> DSM 17368                             | PATRIC   | 926562.3 [ <a href="https://www.patricbrc.org/view/Genome/926562.3">https://www.patricbrc.org/view/Genome/926562.3</a> ]    |
| 38. <i>Blattabacterium</i> sp. ( <i>Blaberus giganteus</i> )               | PATRIC   | 1186051.3 [ <a href="https://www.patricbrc.org/view/Genome/1186051.3">https://www.patricbrc.org/view/Genome/1186051.3</a> ] |
| 39. <i>Chlorobium tepidum</i> TLS                                          | PATRIC   | 194439.7 [ <a href="https://www.patricbrc.org/view/Genome/194439.7">https://www.patricbrc.org/view/Genome/194439.7</a> ]    |
| 40. <i>Chlorobium phaeobacteroides</i> BS1                                 | PATRIC   | 331678.5 [ <a href="https://www.patricbrc.org/view/Genome/331678.5">https://www.patricbrc.org/view/Genome/331678.5</a> ]    |

**Continued**

| Taxon Name                                                      | Database | Genome ID                                                                                                                   |
|-----------------------------------------------------------------|----------|-----------------------------------------------------------------------------------------------------------------------------|
| 41. <i>Chlorobium ferrooxidans</i> DSM 13031                    | PATRIC   | 377431.3 [ <a href="https://www.patricbrc.org/view/Genome/377431.3">https://www.patricbrc.org/view/Genome/377431.3</a> ]    |
| 42. <i>Chlorobium chlorochromatii</i> CaD3                      | PATRIC   | 340177.11 [ <a href="https://www.patricbrc.org/view/Genome/340177.11">https://www.patricbrc.org/view/Genome/340177.11</a> ] |
| 43. <i>Chlorobium phaeovibrioides</i> DSM 265                   | PATRIC   | 290318.6 [ <a href="https://www.patricbrc.org/view/Genome/290318.6">https://www.patricbrc.org/view/Genome/290318.6</a> ]    |
| 44. <i>Chlorobium luteolum</i> DSM 273                          | PATRIC   | 319225.5 [ <a href="https://www.patricbrc.org/view/Genome/319225.5">https://www.patricbrc.org/view/Genome/319225.5</a> ]    |
| 45. <i>Chlorobium phaeobacteroides</i> DSM 266                  | PATRIC   | 290317.9 [ <a href="https://www.patricbrc.org/view/Genome/290317.9">https://www.patricbrc.org/view/Genome/290317.9</a> ]    |
| 46. <i>Chlorobaculum parvum</i> NCIB 8327                       | PATRIC   | 517417.5 [ <a href="https://www.patricbrc.org/view/Genome/517417.5">https://www.patricbrc.org/view/Genome/517417.5</a> ]    |
| 47. <i>Chlorobium limicola</i> DSM 245                          | PATRIC   | 290315.5 [ <a href="https://www.patricbrc.org/view/Genome/290315.5">https://www.patricbrc.org/view/Genome/290315.5</a> ]    |
| 48. <i>Pelodictyon phaeoclathratiforme</i> BU-1                 | PATRIC   | 324925.5 [ <a href="https://www.patricbrc.org/view/Genome/324925.5">https://www.patricbrc.org/view/Genome/324925.5</a> ]    |
| 49. <i>Chloroherpeton thalassium</i> ATCC 35110                 | PATRIC   | 517418.5 [ <a href="https://www.patricbrc.org/view/Genome/517418.5">https://www.patricbrc.org/view/Genome/517418.5</a> ]    |
| 50. <i>Prosthecochloris aestuarii</i> DSM 271                   | PATRIC   | 290512.6 [ <a href="https://www.patricbrc.org/view/Genome/290512.6">https://www.patricbrc.org/view/Genome/290512.6</a> ]    |
| 51. <i>Nitrolancetus hollandicus</i> Lb                         | PATRIC   | 1129897.3 [ <a href="https://www.patricbrc.org/view/Genome/1129897.3">https://www.patricbrc.org/view/Genome/1129897.3</a> ] |
| 52. <i>Dehalococcoides mccartyi</i> CG1                         | PATRIC   | 1432059.3 [ <a href="https://www.patricbrc.org/view/Genome/1432059.3">https://www.patricbrc.org/view/Genome/1432059.3</a> ] |
| 53. <i>Thermomicrobium roseum</i> DSM 5159                      | PATRIC   | 309801.4 [ <a href="https://www.patricbrc.org/view/Genome/309801.4">https://www.patricbrc.org/view/Genome/309801.4</a> ]    |
| 54. <i>Chloroflexus aurantiacus</i> J-10-fl                     | PATRIC   | 324602.8 [ <a href="https://www.patricbrc.org/view/Genome/324602.8">https://www.patricbrc.org/view/Genome/324602.8</a> ]    |
| 55. <i>Chloroflexus aggregans</i> DSM 9485                      | PATRIC   | 326427.4 [ <a href="https://www.patricbrc.org/view/Genome/326427.4">https://www.patricbrc.org/view/Genome/326427.4</a> ]    |
| 56. <i>Sphaerobacter thermophilus</i> DSM 20745                 | PATRIC   | 479434.6 [ <a href="https://www.patricbrc.org/view/Genome/479434.6">https://www.patricbrc.org/view/Genome/479434.6</a> ]    |
| 57. <i>Ktedonobacter racemifer</i> DSM 44963                    | PATRIC   | 485913.3 [ <a href="https://www.patricbrc.org/view/Genome/485913.3">https://www.patricbrc.org/view/Genome/485913.3</a> ]    |
| 58. <i>Dehalogenimonas lykanthroporepellens</i> BL-DC-9         | PATRIC   | 552811.9 [ <a href="https://www.patricbrc.org/view/Genome/552811.9">https://www.patricbrc.org/view/Genome/552811.9</a> ]    |
| 59. <i>Caldilinea aerophila</i> DSM 14535 = NBRC 104270         | PATRIC   | 926550.5 [ <a href="https://www.patricbrc.org/view/Genome/926550.5">https://www.patricbrc.org/view/Genome/926550.5</a> ]    |
| 60. <i>Anaerolinea thermophila</i> UNI-1                        | PATRIC   | 926569.3 [ <a href="https://www.patricbrc.org/view/Genome/926569.3">https://www.patricbrc.org/view/Genome/926569.3</a> ]    |
| 61. <i>Roseiflexus</i> sp. RS-1                                 | PATRIC   | 357808.5 [ <a href="https://www.patricbrc.org/view/Genome/357808.5">https://www.patricbrc.org/view/Genome/357808.5</a> ]    |
| 62. <i>Roseiflexus castenholzii</i> DSM 13941                   | PATRIC   | 383372.6 [ <a href="https://www.patricbrc.org/view/Genome/383372.6">https://www.patricbrc.org/view/Genome/383372.6</a> ]    |
| 63. <i>Prosthecochloris aestuarii</i> DSM 271                   | PATRIC   | 290512.6 [ <a href="https://www.patricbrc.org/view/Genome/290512.6">https://www.patricbrc.org/view/Genome/290512.6</a> ]    |
| 64. <i>Leptolyngbya</i> sp. PCC 7375                            | PATRIC   | 102129.3 [ <a href="https://www.patricbrc.org/view/Genome/102129.3">https://www.patricbrc.org/view/Genome/102129.3</a> ]    |
| 65. <i>Nostoc</i> sp. PCC 7120                                  | PATRIC   | 103690.1 [ <a href="https://www.patricbrc.org/view/Genome/103690.1">https://www.patricbrc.org/view/Genome/103690.1</a> ]    |
| 66. <i>Stanieria cyanosphaera</i> PCC 7437                      | PATRIC   | 111780.3 [ <a href="https://www.patricbrc.org/view/Genome/111780.3">https://www.patricbrc.org/view/Genome/111780.3</a> ]    |
| 67. <i>Geitlerinema</i> sp. PCC 7407                            | PATRIC   | 1173025.3 [ <a href="https://www.patricbrc.org/view/Genome/1173025.3">https://www.patricbrc.org/view/Genome/1173025.3</a> ] |
| 68. <i>Coleofasciculus chthonoplastes</i> PCC 7420              | PATRIC   | 118168.3 [ <a href="https://www.patricbrc.org/view/Genome/118168.3">https://www.patricbrc.org/view/Genome/118168.3</a> ]    |
| 69. <i>Prochlorococcus marinus</i> subsp. marinus str. CCMP1375 | PATRIC   | 167539.5 [ <a href="https://www.patricbrc.org/view/Genome/167539.5">https://www.patricbrc.org/view/Genome/167539.5</a> ]    |
| 70. <i>Thermosynechococcus elongatus</i> BP-1                   | PATRIC   | 197221.4 [ <a href="https://www.patricbrc.org/view/Genome/197221.4">https://www.patricbrc.org/view/Genome/197221.4</a> ]    |
| 71. <i>Trichodesmium erythraeum</i> IMS101                      | PATRIC   | 203124.6 [ <a href="https://www.patricbrc.org/view/Genome/203124.6">https://www.patricbrc.org/view/Genome/203124.6</a> ]    |
| 72. <i>Gloeobacter violaceus</i> PCC 7421                       | PATRIC   | 251221.4 [ <a href="https://www.patricbrc.org/view/Genome/251221.4">https://www.patricbrc.org/view/Genome/251221.4</a> ]    |
| 73. <i>Chroococcidiopsis thermalis</i> PCC 7203                 | PATRIC   | 251229.3 [ <a href="https://www.patricbrc.org/view/Genome/251229.3">https://www.patricbrc.org/view/Genome/251229.3</a> ]    |
| 74. <i>Synechococcus elongatus</i> PCC 6301                     | PATRIC   | 269084.6 [ <a href="https://www.patricbrc.org/view/Genome/269084.6">https://www.patricbrc.org/view/Genome/269084.6</a> ]    |
| 75. <i>Cyanobium gracile</i> PCC 6307                           | PATRIC   | 292564.3 [ <a href="https://www.patricbrc.org/view/Genome/292564.3">https://www.patricbrc.org/view/Genome/292564.3</a> ]    |
| 76. <i>Rivularia</i> sp. PCC 7116                               | PATRIC   | 373994.3 [ <a href="https://www.patricbrc.org/view/Genome/373994.3">https://www.patricbrc.org/view/Genome/373994.3</a> ]    |
| 77. <i>Cyanothece</i> sp. PCC 7822                              | PATRIC   | 497965.6 [ <a href="https://www.patricbrc.org/view/Genome/497965.6">https://www.patricbrc.org/view/Genome/497965.6</a> ]    |
| 78. <i>Arthrospira platensis</i> NIES-39                        | PATRIC   | 696747.3 [ <a href="https://www.patricbrc.org/view/Genome/696747.3">https://www.patricbrc.org/view/Genome/696747.3</a> ]    |
| 79. <i>Pseudanabaena</i> sp. PCC 7367                           | PATRIC   | 82654.3 [ <a href="https://www.patricbrc.org/view/Genome/82654.3">https://www.patricbrc.org/view/Genome/82654.3</a> ]       |
| 80. <i>Melioribacter roseus</i> P3M-2                           | PATRIC   | 1191523.3 [ <a href="https://www.patricbrc.org/view/Genome/1191523.3">https://www.patricbrc.org/view/Genome/1191523.3</a> ] |
| 81. <i>Ignavibacterium album</i> JCM 16511                      | PATRIC   | 945713.3 [ <a href="https://www.patricbrc.org/view/Genome/945713.3">https://www.patricbrc.org/view/Genome/945713.3</a> ]    |

## Continued

| Taxon Name                                                       | Database   | Genome ID                                                                                                                                             |
|------------------------------------------------------------------|------------|-------------------------------------------------------------------------------------------------------------------------------------------------------|
| 82. <i>Obscuribacter phosphatis</i> (Mle1_12)                    | IMG        | 2556921048 [ <a href="https://genome.jgi.doe.gov/portal/IMG_2556921048">https://genome.jgi.doe.gov/portal/IMG_2556921048</a> ]                        |
| 83. <i>Gastranaerophilaceae</i> Zag_1 (Zagget bin 1)             | IMG        | 2523533517 [ <a href="https://genome.jgi.doe.gov/portal/IMG_2523533517">https://genome.jgi.doe.gov/portal/IMG_2523533517</a> ]                        |
| 84. <i>Gastranaerophilaceae</i> Zag_111 (Zagget_111_MP)          | IMG        | 2531839741 [ <a href="https://genome.jgi.doe.gov/portal/IMG_2531839741">https://genome.jgi.doe.gov/portal/IMG_2531839741</a> ]                        |
| 85. <i>Gastranaerophilus phascolarctosicola</i> (Zagget bin 221) | IMG        | 2523533519 [ <a href="https://genome.jgi.doe.gov/portal/IMG_2523533519">https://genome.jgi.doe.gov/portal/IMG_2523533519</a> ]                        |
| 86. <i>Sericytochromatia</i> , from Coal Bed ML635J-21           | R. Soo [1] | CBMW_12 [ <a href="https://www.science.org/doi/10.1126/science.aal3794">https://www.science.org/doi/10.1126/science.aal3794</a> ]                     |
| 87. <i>Sericytochromatia</i> , from Rifle Acetate Amendment      | R. Soo [1] | CBMW_12 [ <a href="https://www.science.org/doi/10.1126/science.aal3794">https://www.science.org/doi/10.1126/science.aal3794</a> ]                     |
| 88. <i>Sericytochromatia</i> , from Photoreactor Bin 72          | R. Soo [1] | LSPB_72 [ <a href="https://www.science.org/doi/10.1126/science.aal3794">https://www.science.org/doi/10.1126/science.aal3794</a> ]                     |
| 89. <i>Oscillochlorois trichoides</i>                            | NCBI       | GCF_000152145.1_ASM15214v1 [ <a href="https://www.ncbi.nlm.nih.gov/assembly/GCF_000152145">https://www.ncbi.nlm.nih.gov/assembly/GCF_000152145</a> ]  |
| 90. <i>Dictyobacter aurantiacus</i>                              | NCBI       | GCA_003967515.1_ASM396751v1 [ <a href="https://www.ncbi.nlm.nih.gov/assembly/GCF_003967515">https://www.ncbi.nlm.nih.gov/assembly/GCF_003967515</a> ] |
| 91. <i>Thermosporothrix hazakensis</i>                           | NCBI       | GCA_003253565.1_ASM325356v1 [ <a href="https://www.ncbi.nlm.nih.gov/assembly/GCF_003253565">https://www.ncbi.nlm.nih.gov/assembly/GCF_003253565</a> ] |
| 92. <i>Ktedonobacter</i> sp. 13_2_20CM_53_11                     | NCBI       | GCA_001914715.1_ASM191471v1 [ <a href="https://www.ncbi.nlm.nih.gov/assembly/GCA_001914715">https://www.ncbi.nlm.nih.gov/assembly/GCA_001914715</a> ] |
| 93. <i>Thermogemmatispora carboxidivorans</i>                    | NCBI       | GCA_000702505.1_ASM70250v1 [ <a href="https://www.ncbi.nlm.nih.gov/assembly/GCA_000702505">https://www.ncbi.nlm.nih.gov/assembly/GCA_000702505</a> ]  |
| 94. <i>Thermogemmatispora onikobensis</i>                        | NCBI       | GCA_001748285.1_ASM174828v1 [ <a href="https://www.ncbi.nlm.nih.gov/assembly/GCA_001748285">https://www.ncbi.nlm.nih.gov/assembly/GCA_001748285</a> ] |
| 95. <i>Thermogemmatispora tikiterensis</i>                       | NCBI       | GCA_003268475.1_ASM326847v1 [ <a href="https://www.ncbi.nlm.nih.gov/assembly/GCA_003268475">https://www.ncbi.nlm.nih.gov/assembly/GCA_003268475</a> ] |
| 96. <i>Kouleothrix aurantiaca</i>                                | NCBI       | GCA_001399705.1_ASM139970v1 [ <a href="https://www.ncbi.nlm.nih.gov/assembly/GCA_001399705">https://www.ncbi.nlm.nih.gov/assembly/GCA_001399705</a> ] |
| 97. <i>Candidatus Chloroploca asiatica</i>                       | NCBI       | GCA_002532075.1_ASM253207v1 [ <a href="https://www.ncbi.nlm.nih.gov/assembly/GCA_002532075">https://www.ncbi.nlm.nih.gov/assembly/GCA_002532075</a> ] |
| 98. <i>Candidatus Viridilinea halotolerans</i>                   | NCBI       | GCA_003934145.1_ASM393414v1 [ <a href="https://www.ncbi.nlm.nih.gov/assembly/GCA_003934145">https://www.ncbi.nlm.nih.gov/assembly/GCA_003934145</a> ] |
| 99. <i>Chloroflexus islandicus</i>                               | NCBI       | GCA_001650695.1_ASM165069v1 [ <a href="https://www.ncbi.nlm.nih.gov/assembly/GCA_001650695">https://www.ncbi.nlm.nih.gov/assembly/GCA_001650695</a> ] |
| 100. <i>Herpetosiphon geysericola</i>                            | NCBI       | GCA_001306135.1_ASM130613v1 [ <a href="https://www.ncbi.nlm.nih.gov/assembly/GCA_001306135">https://www.ncbi.nlm.nih.gov/assembly/GCA_001306135</a> ] |
| 101. <i>Herpetosiphon llansteffanense</i>                        | NCBI       | GCA_003205875.1_ASM320587v1 [ <a href="https://www.ncbi.nlm.nih.gov/assembly/GCA_003205875">https://www.ncbi.nlm.nih.gov/assembly/GCA_003205875</a> ] |
| 102. <i>Thermorudis peleae</i>                                   | NCBI       | GCA_000744775.1_ASM74477v1 [ <a href="https://www.ncbi.nlm.nih.gov/assembly/GCA_000744775">https://www.ncbi.nlm.nih.gov/assembly/GCA_000744775</a> ]  |
| 103. <i>Litorilinea aerophila</i>                                | NCBI       | GCA_002148365.1_ASM214836v1 [ <a href="https://www.ncbi.nlm.nih.gov/assembly/GCA_002148365">https://www.ncbi.nlm.nih.gov/assembly/GCA_002148365</a> ] |
| 104. <i>Ardenticatena maritima</i>                               | NCBI       | GCA_001293545.1_ASM129354v1 [ <a href="https://www.ncbi.nlm.nih.gov/assembly/GCA_001293545">https://www.ncbi.nlm.nih.gov/assembly/GCA_001293545</a> ] |
| 105. <i>Ardenticatena bacterium</i>                              | NCBI       | GCA_003130875.1_ASM313087v1 [ <a href="https://www.ncbi.nlm.nih.gov/assembly/GCA_003130875">https://www.ncbi.nlm.nih.gov/assembly/GCA_003130875</a> ] |
| 106. <i>Thermoflexia bacterium</i>                               | NCBI       | GCA_003694475.1_ASM369447v1 [ <a href="https://www.ncbi.nlm.nih.gov/assembly/GCA_003694475">https://www.ncbi.nlm.nih.gov/assembly/GCA_003694475</a> ] |
| 107. <i>Anaerolineae bacterium</i> SG8_19                        | NCBI       | GCA_001303105.1_ASM130310v1 [ <a href="https://www.ncbi.nlm.nih.gov/assembly/GCA_001303105">https://www.ncbi.nlm.nih.gov/assembly/GCA_001303105</a> ] |
| 108. <i>Candidatus Promineofilum breve</i>                       | NCBI       | GCA_900066015.1_Cfx-K [ <a href="https://www.ncbi.nlm.nih.gov/assembly/GCA_900066015">https://www.ncbi.nlm.nih.gov/assembly/GCA_900066015</a> ]       |
| 109. <i>Anaerolineae bacterium</i> SM23_63                       | NCBI       | GCA_001303965.1_ASM130396v1 [ <a href="https://www.ncbi.nlm.nih.gov/assembly/GCA_001303965">https://www.ncbi.nlm.nih.gov/assembly/GCA_001303965</a> ] |
| 110. <i>Brevefilum fermentans</i>                                | NCBI       | GCA_900184705.1_CAMBI-1 [ <a href="https://www.ncbi.nlm.nih.gov/assembly/GCA_900184705">https://www.ncbi.nlm.nih.gov/assembly/GCA_900184705</a> ]     |
| 111. <i>Anaerolineae bacterium</i> UTCFX2                        | NCBI       | GCA_002050125.1_ASM205012v1 [ <a href="https://www.ncbi.nlm.nih.gov/assembly/GCA_002050125">https://www.ncbi.nlm.nih.gov/assembly/GCA_002050125</a> ] |
| 112. <i>Flexilinea flocculi</i>                                  | NCBI       | GCA_001192795.1_ASM119279v1 [ <a href="https://www.ncbi.nlm.nih.gov/assembly/GCA_001192795">https://www.ncbi.nlm.nih.gov/assembly/GCA_001192795</a> ] |
| 113. <i>Levilinea saccharolytica</i>                             | NCBI       | GCA_001306035.1_ASM130603v1 [ <a href="https://www.ncbi.nlm.nih.gov/assembly/GCA_001306035">https://www.ncbi.nlm.nih.gov/assembly/GCA_001306035</a> ] |
| 114. <i>Ornatilinea apprima</i>                                  | NCBI       | GCA_001306115.1_ASM130611v1 [ <a href="https://www.ncbi.nlm.nih.gov/assembly/GCA_001306115">https://www.ncbi.nlm.nih.gov/assembly/GCA_001306115</a> ] |
| 115. <i>Longilinea arvoryzae</i>                                 | NCBI       | GCA_001050235.2_ASM105023v2 [ <a href="https://www.ncbi.nlm.nih.gov/assembly/GCA_001050235">https://www.ncbi.nlm.nih.gov/assembly/GCA_001050235</a> ] |
| 116. <i>Leptolinea tardivitalis</i>                              | NCBI       | GCA_001050275.1_ASM105027v1 [ <a href="https://www.ncbi.nlm.nih.gov/assembly/GCA_001050275">https://www.ncbi.nlm.nih.gov/assembly/GCA_001050275</a> ] |
| 117. <i>Thermanaerotherix daxensis</i>                           | NCBI       | GCA_001306145.1_ASM130614v1 [ <a href="https://www.ncbi.nlm.nih.gov/assembly/GCA_001306145">https://www.ncbi.nlm.nih.gov/assembly/GCA_001306145</a> ] |
| 118. <i>Bellilinea caldifistulae</i>                             | NCBI       | GCA_001306055.1_ASM130605v1 [ <a href="https://www.ncbi.nlm.nih.gov/assembly/GCA_001306055">https://www.ncbi.nlm.nih.gov/assembly/GCA_001306055</a> ] |
| 119. <i>Pelolinea submarina</i>                                  | NCBI       | GCA_003966975.1_ASM396697v1 [ <a href="https://www.ncbi.nlm.nih.gov/assembly/GCA_003966975">https://www.ncbi.nlm.nih.gov/assembly/GCA_003966975</a> ] |
| 120. <i>Anaerolinea</i> sp. 4484_236                             | NCBI       | GCA_002085065.1_ASM208506v1 [ <a href="https://www.ncbi.nlm.nih.gov/assembly/GCA_002085065">https://www.ncbi.nlm.nih.gov/assembly/GCA_002085065</a> ] |
| 121. <i>Anaerolineae bacterium</i> CG2_30_58_95                  | NCBI       | GCA_001872165.1_ASM187216v1 [ <a href="https://www.ncbi.nlm.nih.gov/assembly/GCA_001872165">https://www.ncbi.nlm.nih.gov/assembly/GCA_001872165</a> ] |

## Continued

| Taxon Name                                                     | Database | Genome ID                                                                                                                                              |
|----------------------------------------------------------------|----------|--------------------------------------------------------------------------------------------------------------------------------------------------------|
| 122. <i>SAR202 cluster bacterium</i> Io17-Chloro-G1            | NCBI     | GCA_002816375.1_ASM281637v1 [ <a href="https://www.ncbi.nlm.nih.gov/assembly/GCA_002816375">https://www.ncbi.nlm.nih.gov/assembly/GCA_002816375</a> ]  |
| 123. <i>SAR202 cluster bacterium</i> Io17-Chloro-G2            | NCBI     | GCA_002816875.1_ASM281687v1 [ <a href="https://www.ncbi.nlm.nih.gov/assembly/GCA_002816875">https://www.ncbi.nlm.nih.gov/assembly/GCA_002816875</a> ]  |
| 124. <i>SAR202 cluster bacterium</i> Io17-Chloro-G3            | NCBI     | GCA_002816985.1_ASM281698v1 [ <a href="https://www.ncbi.nlm.nih.gov/assembly/GCA_002816985">https://www.ncbi.nlm.nih.gov/assembly/GCA_002816985</a> ]  |
| 125. <i>SAR202 cluster bacterium</i> Io17-Chloro-G4            | NCBI     | GCA_002816455.1_ASM281645v1 [ <a href="https://www.ncbi.nlm.nih.gov/assembly/GCA_002816455">https://www.ncbi.nlm.nih.gov/assembly/GCA_002816455</a> ]  |
| 126. <i>SAR202 cluster bacterium</i> Io17-Chloro-G5            | NCBI     | GCA_002816355.1_ASM281635v1 [ <a href="https://www.ncbi.nlm.nih.gov/assembly/GCA_002816355">https://www.ncbi.nlm.nih.gov/assembly/GCA_002816355</a> ]  |
| 127. <i>SAR202 cluster bacterium</i> Io17-Chloro-G6            | NCBI     | GCA_002816585.1_ASM281658v1 [ <a href="https://www.ncbi.nlm.nih.gov/assembly/GCA_002816585">https://www.ncbi.nlm.nih.gov/assembly/GCA_002816585</a> ]  |
| 128. <i>SAR202 cluster bacterium</i> Io17-Chloro-G7            | NCBI     | GCA_002817055.1_ASM281705v1 [ <a href="https://www.ncbi.nlm.nih.gov/assembly/GCA_002817055">https://www.ncbi.nlm.nih.gov/assembly/GCA_002817055</a> ]  |
| 129. <i>SAR202 cluster bacterium</i> Io17-Chloro-G8            | NCBI     | GCA_002817135.1_ASM281713v1 [ <a href="https://www.ncbi.nlm.nih.gov/assembly/GCA_002817135">https://www.ncbi.nlm.nih.gov/assembly/GCA_002817135</a> ]  |
| 130. <i>SAR202 cluster bacterium</i> Io17-Chloro-G9            | NCBI     | GCA_002816675.1_ASM281667v1 [ <a href="https://www.ncbi.nlm.nih.gov/assembly/GCA_002816675">https://www.ncbi.nlm.nih.gov/assembly/GCA_002816675</a> ]  |
| 131. <i>SAR202 cluster bacterium</i> Casp-Chloro-G2            | NCBI     | GCA_002816575.1_ASM281657v1 [ <a href="https://www.ncbi.nlm.nih.gov/assembly/GCA_002816575">https://www.ncbi.nlm.nih.gov/assembly/GCA_002816575</a> ]  |
| 132. <i>SAR202 cluster bacterium</i> Casp-Chloro-G3            | NCBI     | GCA_002816715.1_ASM281671v1 [ <a href="https://www.ncbi.nlm.nih.gov/assembly/GCA_002816715">https://www.ncbi.nlm.nih.gov/assembly/GCA_002816715</a> ]  |
| 133. <i>SAR202 cluster bacterium</i> Casp-Chloro-G4            | NCBI     | GCA_002816705.1_ASM281670v1 [ <a href="https://www.ncbi.nlm.nih.gov/assembly/GCA_002816705">https://www.ncbi.nlm.nih.gov/assembly/GCA_002816705</a> ]  |
| 134. <i>SAR202 cluster bacterium</i> Ae2-Chloro-G2             | NCBI     | GCA_002816925.1_ASM281692v1 [ <a href="https://www.ncbi.nlm.nih.gov/assembly/GCA_002816925">https://www.ncbi.nlm.nih.gov/assembly/GCA_002816925</a> ]  |
| 135. <i>SAR202 cluster bacterium</i> MP-SInd-SRR3963457-G1     | NCBI     | GCA_002817235.1_ASM281723v1 [ <a href="https://www.ncbi.nlm.nih.gov/assembly/GCA_002817235">https://www.ncbi.nlm.nih.gov/assembly/GCA_002817235</a> ]  |
| 136. <i>SAR202 cluster bacterium</i> MP-SInd-SRR3963457-G2     | NCBI     | GCA_002816735.1_ASM281673v1 [ <a href="https://www.ncbi.nlm.nih.gov/assembly/GCA_002816735">https://www.ncbi.nlm.nih.gov/assembly/GCA_002816735</a> ]  |
| 137. <i>SAR202 cluster bacterium</i> MP-NPac-SRR3961935-G1     | NCBI     | GCA_002817285.1_ASM281728v1 [ <a href="https://www.ncbi.nlm.nih.gov/assembly/GCA_002817285">https://www.ncbi.nlm.nih.gov/assembly/GCA_002817285</a> ]  |
| 138. <i>SAR202 cluster bacterium</i> MP-SAtl-SRR3965592-G1     | NCBI     | GCA_002817125.1_ASM281712v1 [ <a href="https://www.ncbi.nlm.nih.gov/assembly/GCA_002817125">https://www.ncbi.nlm.nih.gov/assembly/GCA_002817125</a> ]  |
| 9 139. <i>Fischerella</i> sp. JSC-11                           | NCBI     | GCF_000231365.1_ASM23136v1 [ <a href="https://www.ncbi.nlm.nih.gov/assembly/GCA_000231365">https://www.ncbi.nlm.nih.gov/assembly/GCA_000231365</a> ]   |
| 140. <i>Prochlorothrix hollandica</i> PCC 9006 = CALU 1027     | NCBI     | GCF_000332315.1_ASM33231v1 [ <a href="https://www.ncbi.nlm.nih.gov/assembly/GCA_000332315">https://www.ncbi.nlm.nih.gov/assembly/GCA_000332315</a> ]   |
| 141. <i>Wolbachia endosymbiont of Drosophila simulans</i> wNo  | NCBI     | GCA_000376585.1_ASM37658v1 [ <a href="https://www.ncbi.nlm.nih.gov/assembly/GCA_000376585">https://www.ncbi.nlm.nih.gov/assembly/GCA_000376585</a> ]   |
| 142. <i>Anaplasma phagocytophilum</i> str. Webster             | NCBI     | GCA_000964685.1_ASM96468v1 [ <a href="https://www.ncbi.nlm.nih.gov/assembly/GCA_000964685">https://www.ncbi.nlm.nih.gov/assembly/GCA_000964685</a> ]   |
| 143. <i>Magnetococcus marinus</i> MC-1                         | NCBI     | GCA_000014865.1_ASM1486v1 [ <a href="https://www.ncbi.nlm.nih.gov/assembly/GCA_000014865">https://www.ncbi.nlm.nih.gov/assembly/GCA_000014865</a> ]    |
| 144. <i>Ehrlichia canis</i> str. Jake                          | NCBI     | GCA_000012565.1_ASM1256v1 [ <a href="https://www.ncbi.nlm.nih.gov/assembly/GCA_000012565">https://www.ncbi.nlm.nih.gov/assembly/GCA_000012565</a> ]    |
| 145. <i>Gemmatimonadetes bacterium</i>                         | NCBI     | GCA_003134685.1_20111000_P3M [ <a href="https://www.ncbi.nlm.nih.gov/assembly/GCA_003134685">https://www.ncbi.nlm.nih.gov/assembly/GCA_003134685</a> ] |
| 146. <i>Candidatus Entotheonella factor</i>                    | NCBI     | GCA_000522425.1v3 [ <a href="https://www.ncbi.nlm.nih.gov/assembly/GCA_000522425">https://www.ncbi.nlm.nih.gov/assembly/GCA_000522425</a> ]            |
| 147. <i>Candidatus Entotheonella</i> sp. TSY2                  | NCBI     | GCA_000522445.1v3 [ <a href="https://www.ncbi.nlm.nih.gov/assembly/GCA_000522445">https://www.ncbi.nlm.nih.gov/assembly/GCA_000522445</a> ]            |
| 148. <i>Candidatus Entotheonella palauensis</i>                | NCBI     | GCA_900079095.1_E.gemina.ts [ <a href="https://www.ncbi.nlm.nih.gov/assembly/GCA_900079095">https://www.ncbi.nlm.nih.gov/assembly/GCA_900079095</a> ]  |
| 149. <i>Candidatus Entotheonella sarta</i>                     | NCBI     | GCA_002914425.1_ASM291442v1 [ <a href="https://www.ncbi.nlm.nih.gov/assembly/GCA_002914425">https://www.ncbi.nlm.nih.gov/assembly/GCA_002914425</a> ]  |
| 150. <i>Candidatus Rokubacteria bacterium</i> 13.1_40CM_2_68.8 | NCBI     | GCA_001919035.1_ASM191903v1 [ <a href="https://www.ncbi.nlm.nih.gov/assembly/GCA_001919035">https://www.ncbi.nlm.nih.gov/assembly/GCA_001919035</a> ]  |
| 151. <i>Rhodospirillales bacterium</i> 35-66-84                | NCBI     | GCA_002281325.1_ASM228132v1 [ <a href="https://www.ncbi.nlm.nih.gov/assembly/GCA_002281325">https://www.ncbi.nlm.nih.gov/assembly/GCA_002281325</a> ]  |
| 152. <i>Reyranella</i> sp.                                     | NCBI     | GCA_004297405.1_ASM429740v1 [ <a href="https://www.ncbi.nlm.nih.gov/assembly/GCA_004297405">https://www.ncbi.nlm.nih.gov/assembly/GCA_004297405</a> ]  |
| 153. <i>Reyranella massiliensis</i>                            | NCBI     | GCA_000312425.1_ASM31242v1 [ <a href="https://www.ncbi.nlm.nih.gov/assembly/GCA_000312425">https://www.ncbi.nlm.nih.gov/assembly/GCA_000312425</a> ]   |
| 154. <i>Enhydrobacter aerosaccus</i>                           | NCBI     | GCA_900167455.1_IMG-taxon [ <a href="https://www.ncbi.nlm.nih.gov/assembly/GCA_900167455">https://www.ncbi.nlm.nih.gov/assembly/GCA_900167455</a> ]    |
| 155. <i>Alphaproteobacteria bacterium</i> 65-37                | NCBI     | GCA_001897995.1_ASM189799v1 [ <a href="https://www.ncbi.nlm.nih.gov/assembly/GCA_001897995">https://www.ncbi.nlm.nih.gov/assembly/GCA_001897995</a> ]  |
| 156. <i>Rhodospirillaceae bacterium</i> CCH5-H10               | NCBI     | GCA_001557035.1_ASM155703v1 [ <a href="https://www.ncbi.nlm.nih.gov/assembly/GCA_001557035">https://www.ncbi.nlm.nih.gov/assembly/GCA_001557035</a> ]  |
| 157. <i>Rhodospirillales bacterium</i> 69-11                   | NCBI     | GCA_001898425.1_ASM189842v1 [ <a href="https://www.ncbi.nlm.nih.gov/assembly/GCA_001898425">https://www.ncbi.nlm.nih.gov/assembly/GCA_001898425</a> ]  |
| 158. <i>Belnapia moabensis</i>                                 | NCBI     | GCA_000745835.1_ASM74583v1 [ <a href="https://www.ncbi.nlm.nih.gov/assembly/GCA_000745835">https://www.ncbi.nlm.nih.gov/assembly/GCA_000745835</a> ]   |
| 159. <i>Belnapia</i> sp. F-4-1                                 | NCBI     | GCA_000802185.1_ASM80218v1 [ <a href="https://www.ncbi.nlm.nih.gov/assembly/GCA_000802185">https://www.ncbi.nlm.nih.gov/assembly/GCA_000802185</a> ]   |
| 160. <i>Rhodospirillaceae bacterium</i> SYSU D60015            | NCBI     | GCA_003576705.1_ASM357670v1 [ <a href="https://www.ncbi.nlm.nih.gov/assembly/GCA_003576705">https://www.ncbi.nlm.nih.gov/assembly/GCA_003576705</a> ]  |
| 161. <i>Thermoflexus hugenholtzii</i>                          | NCBI     | GCA_002563855.1_ASM256385v1 [ <a href="https://www.ncbi.nlm.nih.gov/assembly/GCA_002563855">https://www.ncbi.nlm.nih.gov/assembly/GCA_002563855</a> ]  |

## Continued

| Taxon Name                                                           | Database | Genome ID                                                                                                                                              |
|----------------------------------------------------------------------|----------|--------------------------------------------------------------------------------------------------------------------------------------------------------|
| 162. <i>Rhodospirillales bacterium</i> URHD0017                      | NCBI     | GCA_900110395.1_IMG-taxon [ <a href="https://www.ncbi.nlm.nih.gov/assembly/GCA_900110395">https://www.ncbi.nlm.nih.gov/assembly/GCA_900110395</a> ]    |
| 163. <i>Humitalea rosea</i>                                          | NCBI     | GCA_003253705.1_ASM325370v1 [ <a href="https://www.ncbi.nlm.nih.gov/assembly/GCA_003253705">https://www.ncbi.nlm.nih.gov/assembly/GCA_003253705</a> ]  |
| 164. <i>Roseomonas stagni</i>                                        | NCBI     | GCA_900114315.1_IMG-taxon [ <a href="https://www.ncbi.nlm.nih.gov/assembly/GCA_900114315">https://www.ncbi.nlm.nih.gov/assembly/GCA_900114315</a> ]    |
| 165. <i>Rhodospirillales bacterium</i> 70-18                         | NCBI     | GCA_001899585.1_ASM189958v1 [ <a href="https://www.ncbi.nlm.nih.gov/assembly/GCA_001899585">https://www.ncbi.nlm.nih.gov/assembly/GCA_001899585</a> ]  |
| 166. <i>Paracraurococcus ruber</i>                                   | NCBI     | GCA_004353985.1_ASM435398v1 [ <a href="https://www.ncbi.nlm.nih.gov/assembly/GCA_004353985">https://www.ncbi.nlm.nih.gov/assembly/GCA_004353985</a> ]  |
| 167. <i>beta proteobacterium MWH-P2sevCIIIb</i>                      | NCBI     | GCA_003003055.1_ASM300305v1 [ <a href="https://www.ncbi.nlm.nih.gov/assembly/GCA_003003055">https://www.ncbi.nlm.nih.gov/assembly/GCA_003003055</a> ]  |
| 168. <i>Rhodospirillales bacterium</i> 69-11                         | NCBI     | GCA_001898425.1_ASM189842v1 [ <a href="https://www.ncbi.nlm.nih.gov/assembly/GCA_001898425">https://www.ncbi.nlm.nih.gov/assembly/GCA_001898425</a> ]  |
| 169. <i>Rhodospirillaceae bacterium</i> SYSU D60007                  | NCBI     | GCA_003574685.1_ASM357468v1 [ <a href="https://www.ncbi.nlm.nih.gov/assembly/GCA_003574685">https://www.ncbi.nlm.nih.gov/assembly/GCA_003574685</a> ]  |
| 170. <i>Hyphomicrobium</i> sp. CS1BSMeth3                            | NCBI     | GCA_900117415.1_CS1BSMeth3 [ <a href="https://www.ncbi.nlm.nih.gov/assembly/GCA_900117415">https://www.ncbi.nlm.nih.gov/assembly/GCA_900117415</a> ]   |
| 171. <i>Streptomyces</i> sp. Ag109_O5-10                             | NCBI     | GCA_900105755.1_IMG-taxon [ <a href="https://www.ncbi.nlm.nih.gov/assembly/GCA_900105755">https://www.ncbi.nlm.nih.gov/assembly/GCA_900105755</a> ]    |
| 172. <i>Acetobacteraceae bacterium</i>                               | NCBI     | GCA_004843345.1_ASM484334v1 [ <a href="https://www.ncbi.nlm.nih.gov/assembly/GCA_004843345">https://www.ncbi.nlm.nih.gov/assembly/GCA_004843345</a> ]  |
| 173. <i>Dankookia rubra</i>                                          | NCBI     | GCA_004355005.1_ASM435500v1 [ <a href="https://www.ncbi.nlm.nih.gov/assembly/GCA_004355005">https://www.ncbi.nlm.nih.gov/assembly/GCA_004355005</a> ]  |
| 174. <i>Paracraurococcus</i> sp. NE82                                | NCBI     | GCA_004343615.1_ASM434361v1 [ <a href="https://www.ncbi.nlm.nih.gov/assembly/GCA_004343615">https://www.ncbi.nlm.nih.gov/assembly/GCA_004343615</a> ]  |
| 175. <i>Streptomyces fulvoviolaceus</i>                              | NCBI     | GCA_000718165.1_ASM71816v1 [ <a href="https://www.ncbi.nlm.nih.gov/assembly/GCA_000718165">https://www.ncbi.nlm.nih.gov/assembly/GCA_000718165</a> ]   |
| 176. <i>Tepidicaulis</i> sp. EA10                                    | NCBI     | GCA_003688365.1_ASM368836v1 [ <a href="https://www.ncbi.nlm.nih.gov/assembly/GCA_003688365">https://www.ncbi.nlm.nih.gov/assembly/GCA_003688365</a> ]  |
| 177. <i>Roseococcus</i> sp. SYP-B2431                                | NCBI     | GCA_004336745.1_ASM433674v1 [ <a href="https://www.ncbi.nlm.nih.gov/assembly/GCA_004336745">https://www.ncbi.nlm.nih.gov/assembly/GCA_004336745</a> ]  |
| 178. <i>Streptomyces mirabilis</i>                                   | NCBI     | GCA_000746395.1_ASM74639v1 [ <a href="https://www.ncbi.nlm.nih.gov/assembly/GCA_000746395">https://www.ncbi.nlm.nih.gov/assembly/GCA_000746395</a> ]   |
| 179. <i>Streptomyces</i> sp. SA15                                    | NCBI     | GCA_002291145.1_ASM229114v1 [ <a href="https://www.ncbi.nlm.nih.gov/assembly/GCA_002291145">https://www.ncbi.nlm.nih.gov/assembly/GCA_002291145</a> ]  |
| 180. <i>Cystobacter fuscus</i>                                       | NCBI     | GCA_002305875.1_ASM230587v1 [ <a href="https://www.ncbi.nlm.nih.gov/assembly/GCA_002305875">https://www.ncbi.nlm.nih.gov/assembly/GCA_002305875</a> ]  |
| 181. <i>Streptomyces albus</i>                                       | NCBI     | GCA_000827005.1_ASM82700v1 [ <a href="https://www.ncbi.nlm.nih.gov/assembly/GCA_000827005">https://www.ncbi.nlm.nih.gov/assembly/GCA_000827005</a> ]   |
| 182. <i>Mycobacterium</i> sp. AB57                                   | NCBI     | GCA_900157375.1_PRJEB19165 [ <a href="https://www.ncbi.nlm.nih.gov/assembly/GCA_900157375">https://www.ncbi.nlm.nih.gov/assembly/GCA_900157375</a> ]   |
| 183. <i>Streptomyces puniscabiei</i>                                 | NCBI     | GCA_001735805.1_ASM173580v1 [ <a href="https://www.ncbi.nlm.nih.gov/assembly/GCA_001735805">https://www.ncbi.nlm.nih.gov/assembly/GCA_001735805</a> ]  |
| 184. <i>Alphaproteobacteria bacterium</i> HGW-Alphaproteobacteria-3  | NCBI     | GCA_002842875.1_ASM284287v1 [ <a href="https://www.ncbi.nlm.nih.gov/assembly/GCA_002842875">https://www.ncbi.nlm.nih.gov/assembly/GCA_002842875</a> ]  |
| 185. <i>Frankia</i> sp. EUN1f                                        | NCBI     | GCA_000177675.1_ASM17767v1 [ <a href="https://www.ncbi.nlm.nih.gov/assembly/GCA_000177675">https://www.ncbi.nlm.nih.gov/assembly/GCA_000177675</a> ]   |
| 186. <i>Parvibaculum lavamentivorans</i>                             | NCBI     | GCA_000017565.1_ASM1756v1 [ <a href="https://www.ncbi.nlm.nih.gov/assembly/GCA_000017565">https://www.ncbi.nlm.nih.gov/assembly/GCA_000017565</a> ]    |
| 187. <i>Mycolicibacterium moriokaense</i>                            | NCBI     | GCA_002086395.1_ASM208639v1 [ <a href="https://www.ncbi.nlm.nih.gov/assembly/GCA_002086395">https://www.ncbi.nlm.nih.gov/assembly/GCA_002086395</a> ]  |
| 188. <i>Acidimicrobiaceae bacterium</i>                              | NCBI     | GCA_002694625.1_ASM269462v1 [ <a href="https://www.ncbi.nlm.nih.gov/assembly/GCA_002694625">https://www.ncbi.nlm.nih.gov/assembly/GCA_002694625</a> ]  |
| 189. <i>Phenylobacterium</i> sp. LX32                                | NCBI     | GCA_003254475.1_ASM325447v1 [ <a href="https://www.ncbi.nlm.nih.gov/assembly/GCA_003254475">https://www.ncbi.nlm.nih.gov/assembly/GCA_003254475</a> ]  |
| 190. <i>Streptomyces</i> sp. SM1                                     | NCBI     | GCA_002910825.1_ASM291082v1 [ <a href="https://www.ncbi.nlm.nih.gov/assembly/GCA_002910825">https://www.ncbi.nlm.nih.gov/assembly/GCA_002910825</a> ]  |
| 191. <i>Streptomyces rimosus</i>                                     | NCBI     | GCA_004196335.1_ASM419633v1 [ <a href="https://www.ncbi.nlm.nih.gov/assembly/GCA_004196335">https://www.ncbi.nlm.nih.gov/assembly/GCA_004196335</a> ]  |
| 192. <i>Alphaproteobacteria bacterium</i> HGW-Alphaproteobacteria-11 | NCBI     | GCA_002841195.1_ASM284119v1 [ <a href="https://www.ncbi.nlm.nih.gov/assembly/GCA_002841195">https://www.ncbi.nlm.nih.gov/assembly/GCA_002841195</a> ]  |
| 193. <i>Euzebya tangerina</i>                                        | NCBI     | GCA_003074135.1_ASM307413v1 [ <a href="https://www.ncbi.nlm.nih.gov/assembly/GCA_003074135">https://www.ncbi.nlm.nih.gov/assembly/GCA_003074135</a> ]  |
| 194. <i>Ilumatobacter fluminis</i>                                   | NCBI     | GCA_004364865.1_ASM436486v1 [ <a href="https://www.ncbi.nlm.nih.gov/assembly/GCA_004364865">https://www.ncbi.nlm.nih.gov/assembly/GCA_004364865</a> ]  |
| 195. <i>Rhodosalinus</i> sp. E84                                     | NCBI     | GCA_003298775.1_ASM329877v1 [ <a href="https://www.ncbi.nlm.nih.gov/assembly/GCA_003298775">https://www.ncbi.nlm.nih.gov/assembly/GCA_003298775</a> ]  |
| 196. <i>Mycobacterium palustre</i>                                   | NCBI     | GCA_002101785.1_ASM210178v1 [ <a href="https://www.ncbi.nlm.nih.gov/assembly/GCA_002101785">https://www.ncbi.nlm.nih.gov/assembly/GCA_002101785</a> ]  |
| 197. <i>Ilumatobacter nonamiensis</i>                                | NCBI     | GCA_000350145.1_ASM35014v1 [ <a href="https://www.ncbi.nlm.nih.gov/assembly/GCA_000350145">https://www.ncbi.nlm.nih.gov/assembly/GCA_000350145</a> ]   |
| 198. <i>Mycobacterium</i> sp. 1274761.0                              | NCBI     | GCA_001668615.1_SM166861v1 [ <a href="https://www.ncbi.nlm.nih.gov/assembly/GCA_001668615">https://www.ncbi.nlm.nih.gov/assembly/GCA_001668615</a> ]   |
| 199. <i>Mycobacterium triplex</i>                                    | NCBI     | GCA_002102415.1_ASM210241v1 [ <a href="https://www.ncbi.nlm.nih.gov/assembly/GCA_002102415">https://www.ncbi.nlm.nih.gov/assembly/GCA_002102415</a> ]  |
| 200. <i>Caulobacteraceae bacterium</i>                               | NCBI     | GCA_003164925.1_20120700_SID [ <a href="https://www.ncbi.nlm.nih.gov/assembly/GCA_003164925">https://www.ncbi.nlm.nih.gov/assembly/GCA_003164925</a> ] |
| 201. <i>Sphingomonas mucosissima</i>                                 | NCBI     | GCA_002197665.1_ASM219766v1 [ <a href="https://www.ncbi.nlm.nih.gov/assembly/GCA_002197665">https://www.ncbi.nlm.nih.gov/assembly/GCA_002197665</a> ]  |
| 202. <i>Salinispora pacifica</i>                                     | NCBI     | GCA_000514775.1_ASM51477v1 [ <a href="https://www.ncbi.nlm.nih.gov/assembly/GCA_000514775">https://www.ncbi.nlm.nih.gov/assembly/GCA_000514775</a> ]   |

## Continued

| Taxon Name                                                                     | Database | Genome ID                                                                                                                                               |
|--------------------------------------------------------------------------------|----------|---------------------------------------------------------------------------------------------------------------------------------------------------------|
| 203. <i>Caulobacter mirabilis</i>                                              | NCBI     | GCA_002749615.1_ASM274961v1 [ <a href="https://www.ncbi.nlm.nih.gov/assembly/GCA_002749615">https://www.ncbi.nlm.nih.gov/assembly/GCA_002749615</a> ]   |
| 204. <i>Rubritepida flocculans</i>                                             | NCBI     | GCA_000425365.1_ASM42536v1 [ <a href="https://www.ncbi.nlm.nih.gov/assembly/GCA_000425365">https://www.ncbi.nlm.nih.gov/assembly/GCA_000425365</a> ]    |
| 205. <i>Phenylobacterium</i> sp. SCN 70-31                                     | NCBI     | GCA_001724605.1_ASM172460v1 [ <a href="https://www.ncbi.nlm.nih.gov/assembly/GCA_001724605">https://www.ncbi.nlm.nih.gov/assembly/GCA_001724605</a> ]   |
| 206. <i>Sphingomonas</i> sp. 66-10                                             | NCBI     | GCA_001897045.1_ASM189704v1 [ <a href="https://www.ncbi.nlm.nih.gov/assembly/GCA_001897045">https://www.ncbi.nlm.nih.gov/assembly/GCA_001897045</a> ]   |
| 207. <i>Phenylobacterium</i> sp. RIFCSPHIGHO2_01_FULL_69_31                    | NCBI     | GCA_001824475.1_ASM182447v1 [ <a href="https://www.ncbi.nlm.nih.gov/assembly/GCA_001824475">https://www.ncbi.nlm.nih.gov/assembly/GCA_001824475</a> ]   |
| 208. <i>Mycobacterium</i> sp. 1100029.7                                        | NCBI     | GCA_001665235.1_ASM166523v1 [ <a href="https://www.ncbi.nlm.nih.gov/assembly/GCA_001665235">https://www.ncbi.nlm.nih.gov/assembly/GCA_001665235</a> ]   |
| 209. <i>Sphingomonas</i> sp. 67-36                                             | NCBI     | GCA_001897375.1_ASM189737v1 [ <a href="https://www.ncbi.nlm.nih.gov/assembly/GCA_001897375">https://www.ncbi.nlm.nih.gov/assembly/GCA_001897375</a> ]   |
| 210. <i>Cryptosporangium aurantiacum</i>                                       | NCBI     | GCA_900143005.1_IMG-taxon [ <a href="https://www.ncbi.nlm.nih.gov/assembly/GCA_900143005">https://www.ncbi.nlm.nih.gov/assembly/GCA_900143005</a> ]     |
| 211. <i>Phenylobacterium zucineum</i>                                          | NCBI     | GCA_c.1_ASM324335v1 [ <a href="https://www.ncbi.nlm.nih.gov/assembly/GCA_900143005">https://www.ncbi.nlm.nih.gov/assembly/GCA_900143005</a> ]           |
| 212. <i>Sphingomonas jeddahensis</i>                                           | NCBI     | GCA_001981525.1_ASM198152v1 [ <a href="https://www.ncbi.nlm.nih.gov/assembly/GCA_001981525">https://www.ncbi.nlm.nih.gov/assembly/GCA_001981525</a> ]   |
| 213. <i>Frankia asymbiotica</i>                                                | NCBI     | GCA_001983105.1_ASM198310v1 [ <a href="https://www.ncbi.nlm.nih.gov/assembly/GCA_001983105">https://www.ncbi.nlm.nih.gov/assembly/GCA_001983105</a> ]   |
| 214. <i>Mycobacterium arosiense</i>                                            | NCBI     | GCA_002086125.1_ASM208612v1 [ <a href="https://www.ncbi.nlm.nih.gov/assembly/GCA_002086125">https://www.ncbi.nlm.nih.gov/assembly/GCA_002086125</a> ]   |
| 215. <i>Mycobacterium mantenii</i>                                             | NCBI     | GCA_002086335.1_ASM208633v1 [ <a href="https://www.ncbi.nlm.nih.gov/assembly/GCA_002086335">https://www.ncbi.nlm.nih.gov/assembly/GCA_002086335</a> ]   |
| 216. <i>Mycobacterium marseillense</i>                                         | NCBI     | GCA_002285715.1_ASM228571v1 [ <a href="https://www.ncbi.nlm.nih.gov/assembly/GCA_002285715">https://www.ncbi.nlm.nih.gov/assembly/GCA_002285715</a> ]   |
| 217. <i>Streptomyces scabrisporus</i>                                          | NCBI     | GCA_000372745.1_ASM37274v1 [ <a href="https://www.ncbi.nlm.nih.gov/assembly/GCA_000372745">https://www.ncbi.nlm.nih.gov/assembly/GCA_000372745</a> ]    |
| 218. <i>Mycobacterium conspicuum</i>                                           | NCBI     | GCA_002102095.1_ASM210209v1 [ <a href="https://www.ncbi.nlm.nih.gov/assembly/GCA_002102095">https://www.ncbi.nlm.nih.gov/assembly/GCA_002102095</a> ]   |
| 219. <i>Phenylobacterium</i> sp. Root700                                       | NCBI     | GCA_001429025.1_Root700 [ <a href="https://www.ncbi.nlm.nih.gov/assembly/GCA_001429025">https://www.ncbi.nlm.nih.gov/assembly/GCA_001429025</a> ]       |
| ∞ 220. <i>Actinobacteria bacterium</i> IMCC26207                               | NCBI     | GCA_001025035.1_ASM102503v1 [ <a href="https://www.ncbi.nlm.nih.gov/assembly/GCA_001025035">https://www.ncbi.nlm.nih.gov/assembly/GCA_001025035</a> ]   |
| 221. <i>Verrucosipora</i> sp. SN26 <sub>1</sub> 4.1                            | NCBI     | GCA_004307965.1_ASM430796v1 [ <a href="https://www.ncbi.nlm.nih.gov/assembly/GCA_004307965">https://www.ncbi.nlm.nih.gov/assembly/GCA_004307965</a> ]   |
| 222. <i>Sphingomonas</i> sp. Leaf412                                           | NCBI     | GCA_001425405.1_Leaf412 [ <a href="https://www.ncbi.nlm.nih.gov/assembly/GCA_001425405">https://www.ncbi.nlm.nih.gov/assembly/GCA_001425405</a> ]       |
| 223. <i>Mycobacterium</i> sp. EPG1                                             | NCBI     | GCA_002946335.1_ASM294633v1 [ <a href="https://www.ncbi.nlm.nih.gov/assembly/GCA_002946335">https://www.ncbi.nlm.nih.gov/assembly/GCA_002946335</a> ]   |
| 224. <i>Mycolicibacterium chubuense</i>                                        | NCBI     | GCA_000266905.1_ASM26690v1 [ <a href="https://www.ncbi.nlm.nih.gov/assembly/GCA_000266905">https://www.ncbi.nlm.nih.gov/assembly/GCA_000266905</a> ]    |
| 225. <i>Chromatiales bacterium</i> ( <i>Bugula neritina</i> AB1)               | NCBI     | GCA_002729495.1_ASM272949v1 [ <a href="https://www.ncbi.nlm.nih.gov/assembly/GCA_002729495">https://www.ncbi.nlm.nih.gov/assembly/GCA_002729495</a> ]   |
| 226. <i>Mycobacterium</i> sp. NAZ190054                                        | NCBI     | GCA_001545925.1_ASM154592v1 [ <a href="https://www.ncbi.nlm.nih.gov/assembly/GCA_001545925">https://www.ncbi.nlm.nih.gov/assembly/GCA_001545925</a> ]   |
| 227. <i>Amycolatopsis circi</i>                                                | NCBI     | GCA_003385235.1_ASM338523v1 [ <a href="https://www.ncbi.nlm.nih.gov/assembly/GCA_003385235">https://www.ncbi.nlm.nih.gov/assembly/GCA_003385235</a> ]   |
| 228. <i>Mycolicibacterium duvalii</i>                                          | NCBI     | GCA_002553585.1_ASM255358v1 [ <a href="https://www.ncbi.nlm.nih.gov/assembly/GCA_002553585">https://www.ncbi.nlm.nih.gov/assembly/GCA_002553585</a> ]   |
| 229. <i>Gemmobacter intermedius</i>                                            | NCBI     | GCA_004054105.1_ASM405410v1 [ <a href="https://www.ncbi.nlm.nih.gov/assembly/GCA_004054105">https://www.ncbi.nlm.nih.gov/assembly/GCA_004054105</a> ]   |
| 230. <i>Mycobacterium</i> sp. AT1                                              | NCBI     | GCA_002043095.1_ASM204309v1 [ <a href="https://www.ncbi.nlm.nih.gov/assembly/GCA_002043095">https://www.ncbi.nlm.nih.gov/assembly/GCA_002043095</a> ]   |
| 231. <i>Sphingomonas</i> sp. JJ-A5 ( <i>Tardibacter chloracetimidivorans</i> ) | NCBI     | GCA_001890385.1_ASM189038v1 [ <a href="https://www.ncbi.nlm.nih.gov/assembly/GCA_001890385">https://www.ncbi.nlm.nih.gov/assembly/GCA_001890385</a> ]   |
| 232. <i>Mycobacterium</i> sp. Soil538                                          | NCBI     | GCA_001428285.1_Soil538 [ <a href="https://www.ncbi.nlm.nih.gov/assembly/GCA_001428285">https://www.ncbi.nlm.nih.gov/assembly/GCA_001428285</a> ]       |
| 233. <i>Thalassococcus</i> sp. S3                                              | NCBI     | GCA_004216475.1_ASM421647v1 [ <a href="https://www.ncbi.nlm.nih.gov/assembly/GCA_004216475">https://www.ncbi.nlm.nih.gov/assembly/GCA_004216475</a> ]   |
| 234. <i>Mycobacterium</i> sp. 852013-51886_SCH5428379                          | NCBI     | GCA_001665575.1_ASM166557v1 [ <a href="https://www.ncbi.nlm.nih.gov/assembly/GCA_001665575">https://www.ncbi.nlm.nih.gov/assembly/GCA_001665575</a> ]   |
| 235. <i>Gemmobacter</i> sp. YIM 102744-1                                       | NCBI     | GCA_003863335.1_ASM386333v1 [ <a href="https://www.ncbi.nlm.nih.gov/assembly/GCA_003863335">https://www.ncbi.nlm.nih.gov/assembly/GCA_003863335</a> ]   |
| 236. <i>Mycobacterium</i> sp. Root135                                          | NCBI     | GCA_001426545.1_Root135 [ <a href="https://www.ncbi.nlm.nih.gov/assembly/GCA_001426545">https://www.ncbi.nlm.nih.gov/assembly/GCA_001426545</a> ]       |
| 237. <i>Candidatus Rhodobacter lobularis</i>                                   | NCBI     | GCA_001078595.1_ASM107859v1 [ <a href="https://www.ncbi.nlm.nih.gov/assembly/GCA_001078595">https://www.ncbi.nlm.nih.gov/assembly/GCA_001078595</a> ]   |
| 238. <i>Sphingomonas</i> sp. TZW2008                                           | NCBI     | GCA_002117915.1_SpTZW2008.1.0 [ <a href="https://www.ncbi.nlm.nih.gov/assembly/GCA_002117915">https://www.ncbi.nlm.nih.gov/assembly/GCA_002117915</a> ] |
| 239. <i>Geodermatophilus</i> sp. Leaf369                                       | NCBI     | GCA_001424455.1_Leaf369 [ <a href="https://www.ncbi.nlm.nih.gov/assembly/GCA_001424455">https://www.ncbi.nlm.nih.gov/assembly/GCA_001424455</a> ]       |
| 240. <i>Ktedonobacterales bacterium</i> Uno16                                  | NCBI     | GCA_003967575.1_ASM396757v1 [ <a href="https://www.ncbi.nlm.nih.gov/assembly/GCA_003967575">https://www.ncbi.nlm.nih.gov/assembly/GCA_003967575</a> ]   |
| 241. <i>Ktedonobacterales bacterium</i> Uno11                                  | NCBI     | GCA_003967555.1_ASM396755v1 [ <a href="https://www.ncbi.nlm.nih.gov/assembly/GCA_003967555">https://www.ncbi.nlm.nih.gov/assembly/GCA_003967555</a> ]   |
| 242. <i>Bradyrhizobium</i> sp. th.b2                                           | NCBI     | GCA_000426785.1_ASM42678v1 [ <a href="https://www.ncbi.nlm.nih.gov/assembly/GCA_000426785">https://www.ncbi.nlm.nih.gov/assembly/GCA_000426785</a> ]    |
| 243. <i>Nostoc</i> sp. 3335mG                                                  | NCBI     | GCA_003185865.1_ASM318586v1 [ <a href="https://www.ncbi.nlm.nih.gov/assembly/GCA_003185865">https://www.ncbi.nlm.nih.gov/assembly/GCA_003185865</a> ]   |



## Continued

| Taxon Name                                                              | Database | Genome ID                                                                                                                                             |
|-------------------------------------------------------------------------|----------|-------------------------------------------------------------------------------------------------------------------------------------------------------|
| 244. <i>Mycobacterium</i> sp. CECT 8778                                 | NCBI     | GCA_002591975.1_ASM259197v1 [ <a href="https://www.ncbi.nlm.nih.gov/assembly/GCA_002591975">https://www.ncbi.nlm.nih.gov/assembly/GCA_002591975</a> ] |
| 245. <i>Ktedonobacterales bacterium</i> Uno3                            | NCBI     | GCA_003967535.1_ASM396753v1 [ <a href="https://www.ncbi.nlm.nih.gov/assembly/GCA_003967535">https://www.ncbi.nlm.nih.gov/assembly/GCA_003967535</a> ] |
| 246. <i>Dehalococcoidia bacterium</i> SG8_51_3                          | NCBI     | GCA_001303565.1_ASM130356v1 [ <a href="https://www.ncbi.nlm.nih.gov/assembly/GCA_001303565">https://www.ncbi.nlm.nih.gov/assembly/GCA_001303565</a> ] |
| 247. <i>Dehalococcoidia bacterium</i> SM23_28_2                         | NCBI     | GCA_001303545.1_ASM130354v1 [ <a href="https://www.ncbi.nlm.nih.gov/assembly/GCA_001303545">https://www.ncbi.nlm.nih.gov/assembly/GCA_001303545</a> ] |
| 248. <i>Dehalococcoidia bacterium</i> CG2_30_46_9                       | NCBI     | GCA_001873005.1_ASM187300v1 [ <a href="https://www.ncbi.nlm.nih.gov/assembly/GCA_">https://www.ncbi.nlm.nih.gov/assembly/GCA_</a> ]                   |
| 249. <i>Dehalogenimonas alkenigignens</i>                               | NCBI     | GCA_003095415.1_ASM309541v1 [ <a href="https://www.ncbi.nlm.nih.gov/assembly/GCA_003095415">https://www.ncbi.nlm.nih.gov/assembly/GCA_003095415</a> ] |
| 250. <i>Mycolicibacterium iranicum</i>                                  | NCBI     | GCA_002101705.1_ASM210170v1 [ <a href="https://www.ncbi.nlm.nih.gov/assembly/GCA_002101705">https://www.ncbi.nlm.nih.gov/assembly/GCA_002101705</a> ] |
| 251. <i>Salinispora arenicola</i> CNS-205 ( <i>Micromonosporaceae</i> ) | NCBI     | GCA_000018265.1_ASM1826v1 [ <a href="https://www.ncbi.nlm.nih.gov/assembly/GCA_000018265">https://www.ncbi.nlm.nih.gov/assembly/GCA_000018265</a> ]   |
| 252. <i>Gordonia</i> sp.                                                | NCBI     | GCA_003987705.1_ASM398770v1 [ <a href="https://www.ncbi.nlm.nih.gov/assembly/GCA_003987705">https://www.ncbi.nlm.nih.gov/assembly/GCA_003987705</a> ] |
| 253. <i>Albimonas pacifica</i>                                          | NCBI     | GCA_900113695.1_IMG-taxon [ <a href="https://www.ncbi.nlm.nih.gov/assembly/GCA_900113695">https://www.ncbi.nlm.nih.gov/assembly/GCA_900113695</a> ]   |
| 254. <i>Alphaproteobacteria bacterium</i> PA2                           | NCBI     | GCA_002256425.1_ASM225642v1 [ <a href="https://www.ncbi.nlm.nih.gov/assembly/GCA_002256425">https://www.ncbi.nlm.nih.gov/assembly/GCA_002256425</a> ] |
| 255. <i>Streptomycetaceae</i>                                           | NCBI     | GCA_000331185.1_ASM33118v1 [ <a href="https://www.ncbi.nlm.nih.gov/assembly/GCA_000331185">https://www.ncbi.nlm.nih.gov/assembly/GCA_000331185</a> ]  |
| 256. <i>Saccharopolyspora flava</i>                                     | NCBI     | GCA_900116135.1_IMG-taxon [ <a href="https://www.ncbi.nlm.nih.gov/assembly/GCA_900116135">https://www.ncbi.nlm.nih.gov/assembly/GCA_900116135</a> ]   |
| 257. <i>Bradyrhizobium japonicum</i>                                    | NCBI     | GCA_001887695.1_ASM188769v1 [ <a href="https://www.ncbi.nlm.nih.gov/assembly/GCA_001887695">https://www.ncbi.nlm.nih.gov/assembly/GCA_001887695</a> ] |
| 258. <i>Mycobacterium genavense</i>                                     | NCBI     | GCA_000526915.1_ASM52691v1 [ <a href="https://www.ncbi.nlm.nih.gov/assembly/GCA_000526915">https://www.ncbi.nlm.nih.gov/assembly/GCA_000526915</a> ]  |
| 259. <i>Bradyrhizobium</i> sp. BTAi1                                    | NCBI     | GCA_000015165.1_ASM1516v1 [ <a href="https://www.ncbi.nlm.nih.gov/assembly/GCA_000015165">https://www.ncbi.nlm.nih.gov/assembly/GCA_000015165</a> ]   |
| 260. <i>Dehalogenimonas formicexedens</i>                               | NCBI     | GCA_001953175.1_ASM195317v1 [ <a href="https://www.ncbi.nlm.nih.gov/assembly/GCA_001953175">https://www.ncbi.nlm.nih.gov/assembly/GCA_001953175</a> ] |
| 261. <i>Mycolicibacterium rhodesiae</i>                                 | NCBI     | GCA_002086695.1_ASM208669v1 [ <a href="https://www.ncbi.nlm.nih.gov/assembly/GCA_002086695">https://www.ncbi.nlm.nih.gov/assembly/GCA_002086695</a> ] |
| 262. <i>Bradyrhizobium elkanii</i>                                      | NCBI     | GCA_001718185.1_ASM171818v1 [ <a href="https://www.ncbi.nlm.nih.gov/assembly/GCA_001718185">https://www.ncbi.nlm.nih.gov/assembly/GCA_001718185</a> ] |
| 263. <i>Bradyrhizobium</i> sp. STM 3843                                 | NCBI     | GCA_000239815.2_ASM23981v2 [ <a href="https://www.ncbi.nlm.nih.gov/assembly/GCA_000239815">https://www.ncbi.nlm.nih.gov/assembly/GCA_000239815</a> ]  |
| 264. <i>Amycolatopsis australiensis</i>                                 | NCBI     | GCA_900119165.1_IMG-taxon [ <a href="https://www.ncbi.nlm.nih.gov/assembly/GCA_900119165">https://www.ncbi.nlm.nih.gov/assembly/GCA_900119165</a> ]   |
| 265. <i>Bradyrhizobium valentinum</i>                                   | NCBI     | GCA_001440405.1_ASM144040v1 [ <a href="https://www.ncbi.nlm.nih.gov/assembly/GCA_001440405">https://www.ncbi.nlm.nih.gov/assembly/GCA_001440405</a> ] |
| 266. <i>Bradyrhizobium</i> sp. Tv2a-2                                   | NCBI     | GCA_000472425.1_ASM47242v1 [ <a href="https://www.ncbi.nlm.nih.gov/assembly/GCA_000472425">https://www.ncbi.nlm.nih.gov/assembly/GCA_000472425</a> ]  |
| 267. <i>Saccharopolyspora shandongensis</i>                             | NCBI     | GCA_900106995.1_IMG-taxon [ <a href="https://www.ncbi.nlm.nih.gov/assembly/GCA_900106995">https://www.ncbi.nlm.nih.gov/assembly/GCA_900106995</a> ]   |
| 268. <i>Pseudonocardia</i> sp. CNS-004                                  | NCBI     | GCA_001942185.1_ASM194218v1 [ <a href="https://www.ncbi.nlm.nih.gov/assembly/GCA_001942185">https://www.ncbi.nlm.nih.gov/assembly/GCA_001942185</a> ] |
| 269. <i>Acidimicrobiales bacterium</i> mtb01                            | NCBI     | GCA_004379135.1_ASM437913v1 [ <a href="https://www.ncbi.nlm.nih.gov/assembly/GCA_004379135">https://www.ncbi.nlm.nih.gov/assembly/GCA_004379135</a> ] |
| 270. <i>Minwuiia thermotolerans</i>                                     | NCBI     | GCA_002924445.1_ASM292444v1 [ <a href="https://www.ncbi.nlm.nih.gov/assembly/GCA_002924445">https://www.ncbi.nlm.nih.gov/assembly/GCA_002924445</a> ] |
| 271. <i>Parahaliea mediterranea</i>                                     | NCBI     | GCA_003402235.1_ASM340223v1 [ <a href="https://www.ncbi.nlm.nih.gov/assembly/GCA_003402235">https://www.ncbi.nlm.nih.gov/assembly/GCA_003402235</a> ] |
| 272. <i>Rhizobium</i> sp. BK251                                         | NCBI     | GCA_004345245.1_ASM434524v1 [ <a href="https://www.ncbi.nlm.nih.gov/assembly/GCA_004345245">https://www.ncbi.nlm.nih.gov/assembly/GCA_004345245</a> ] |
| 273. <i>Rhizobium Actinomycetospora succinea</i>                        | NCBI     | GCA_004363095.1_ASM436309v1 [ <a href="https://www.ncbi.nlm.nih.gov/assembly/GCA_004363095">https://www.ncbi.nlm.nih.gov/assembly/GCA_004363095</a> ] |
| 274. <i>Saccharopolyspora</i> sp. 7K502                                 | NCBI     | GCA_004348985.1_ASM434898v1 [ <a href="https://www.ncbi.nlm.nih.gov/assembly/GCA_004348985">https://www.ncbi.nlm.nih.gov/assembly/GCA_004348985</a> ] |
| 275. <i>Nocardia otitidiscaviarum</i>                                   | NCBI     | GCA_900454305.1_54984_D01 [ <a href="https://www.ncbi.nlm.nih.gov/assembly/GCA_900454305">https://www.ncbi.nlm.nih.gov/assembly/GCA_900454305</a> ]   |
| 276. <i>Alphaproteobacteria bacterium</i> 62-8                          | NCBI     | GCA_001898015.1_ASM189801v1 [ <a href="https://www.ncbi.nlm.nih.gov/assembly/GCA_001898015">https://www.ncbi.nlm.nih.gov/assembly/GCA_001898015</a> ] |
| 277. <i>Cumulibacter</i> sp. G-1                                        | NCBI     | GCA_004382795.1_ASM438279v1 [ <a href="https://www.ncbi.nlm.nih.gov/assembly/GCA_004382795">https://www.ncbi.nlm.nih.gov/assembly/GCA_004382795</a> ] |
| 278. <i>Gordonia westfalica</i>                                         | NCBI     | GCA_900105725.1_IMG-taxon [ <a href="https://www.ncbi.nlm.nih.gov/assembly/GCA_900105725">https://www.ncbi.nlm.nih.gov/assembly/GCA_900105725</a> ]   |
| 279. <i>Pseudonocardia acaciae</i>                                      | NCBI     | GCA_000620785.1_ASM62078v1 [ <a href="https://www.ncbi.nlm.nih.gov/assembly/GCA_000620785">https://www.ncbi.nlm.nih.gov/assembly/GCA_000620785</a> ]  |
| 280. <i>Actinopolyspora erythraea</i>                                   | NCBI     | GCA_002263515.1_ASM226351v1 [ <a href="https://www.ncbi.nlm.nih.gov/assembly/GCA_002263515">https://www.ncbi.nlm.nih.gov/assembly/GCA_002263515</a> ] |
| 281. <i>Sphingomonas</i> sp. SRS2                                       | NCBI     | GCA_000971055.1_SRS2.1.0 [ <a href="https://www.ncbi.nlm.nih.gov/assembly/GCA_000971055">https://www.ncbi.nlm.nih.gov/assembly/GCA_000971055</a> ]    |
| 282. <i>Saccharothrix espanaensis</i>                                   | NCBI     | GCA_000328705.1_ASM32870v1 [ <a href="https://www.ncbi.nlm.nih.gov/assembly/GCA_000328705">https://www.ncbi.nlm.nih.gov/assembly/GCA_000328705</a> ]  |
| 283. <i>Rhodopila globiformis</i>                                       | NCBI     | GCA_002937115.1_ASM293711v1 [ <a href="https://www.ncbi.nlm.nih.gov/assembly/GCA_002937115">https://www.ncbi.nlm.nih.gov/assembly/GCA_002937115</a> ] |
| 284. <i>Afipia</i> sp. P52-10                                           | NCBI     | GCA_000516555.1_P52-10 [ <a href="https://www.ncbi.nlm.nih.gov/assembly/GCA_000516555">https://www.ncbi.nlm.nih.gov/assembly/GCA_000516555</a> ]      |

**Continued**

| Taxon Name                                   | Database | Genome ID                                                                                                                                                      |
|----------------------------------------------|----------|----------------------------------------------------------------------------------------------------------------------------------------------------------------|
| 285. <i>Afipia broomeae</i>                  | NCBI     | GCA_002797635.1_ASM279763v1 [ <a href="https://www.ncbi.nlm.nih.gov/assembly/GCA_002797635">https://www.ncbi.nlm.nih.gov/assembly/GCA_002797635</a> ]          |
| 286. <i>Actinomycetospora chiangmaiensis</i> | NCBI     | GCA_000379625.1_ASM37962v1 [ <a href="https://www.ncbi.nlm.nih.gov/assembly/GCA_000379625">https://www.ncbi.nlm.nih.gov/assembly/GCA_000379625</a> ]           |
| 287. <i>Pseudonocardia endophytica</i>       | NCBI     | GCA_004339565.1_ASM433956v1 [ <a href="https://www.ncbi.nlm.nih.gov/assembly/GCA_004339565">https://www.ncbi.nlm.nih.gov/assembly/GCA_004339565</a> ]          |
| 288. <i>Sphingomonas</i> sp. YZ-8            | NCBI     | GCA_003660165.1_ASM366016v1 [ <a href="https://www.ncbi.nlm.nih.gov/assembly/GCA_003660165">https://www.ncbi.nlm.nih.gov/assembly/GCA_003660165</a> ]          |
| 289. <i>Pseudonocardia autotrophica</i>      | NCBI     | GCA_002119215.1_ASM211921v1 [ <a href="https://www.ncbi.nlm.nih.gov/assembly/GCA_002119215">https://www.ncbi.nlm.nih.gov/assembly/GCA_002119215</a> ]          |
| 290. <i>Rhodococcus</i> sp. S2-17            | NCBI     | GCA_003130705.1_ASM313070v1 [ <a href="https://www.ncbi.nlm.nih.gov/assembly/GCA_003130705">https://www.ncbi.nlm.nih.gov/assembly/GCA_003130705</a> ]          |
| 291. <i>Nocardia niigatensis</i>             | NCBI     | GCA_000308655.1_ASM30865v1 [ <a href="https://www.ncbi.nlm.nih.gov/assembly/GCA_000308655">https://www.ncbi.nlm.nih.gov/assembly/GCA_000308655</a> ]           |
| 292. <i>Dactylosporangium aurantiacum</i>    | NCBI     | GCA_000716715.1_ASM71671v1 [ <a href="https://www.ncbi.nlm.nih.gov/assembly/GCA_000716715">https://www.ncbi.nlm.nih.gov/assembly/GCA_000716715</a> ]           |
| 293. <i>Allokutzneria albata</i>             | NCBI     | GCA_900103775.1_IMG-taxon_2634166198 [ <a href="https://www.ncbi.nlm.nih.gov/assembly/GCA_900103775">https://www.ncbi.nlm.nih.gov/assembly/GCA_900103775</a> ] |
| 294. <i>Streptomyces tsukubensis</i>         | NCBI     | GCA_002007125.1_ASM200712v1 [ <a href="https://www.ncbi.nlm.nih.gov/assembly/GCA_002007125">https://www.ncbi.nlm.nih.gov/assembly/GCA_002007125</a> ]          |
| 295. <i>Nocardia seriola</i>                 | NCBI     | GCA_001865855.1_ASM186585v1 [ <a href="https://www.ncbi.nlm.nih.gov/assembly/GCA_001865855">https://www.ncbi.nlm.nih.gov/assembly/GCA_001865855</a> ]          |
| 296. <i>Actinobacteria bacterium</i>         | NCBI     | GCA_004376625.1_ASM437662v1 [ <a href="https://www.ncbi.nlm.nih.gov/assembly/GCA_004376625">https://www.ncbi.nlm.nih.gov/assembly/GCA_004376625</a> ]          |
| 297. <i>Enhydrobacter aerosaccus</i> SK60    | NCBI     | GCA_000175915.1_ASM17591v1 [ <a href="https://www.ncbi.nlm.nih.gov/assembly/GCA_000175915">https://www.ncbi.nlm.nih.gov/assembly/GCA_000175915</a> ]           |
| 298. <i>Amycolatopsis</i> sp. BJA-103        | NCBI     | GCA_002849735.1_ASM284973v1 [ <a href="https://www.ncbi.nlm.nih.gov/assembly/GCA_002849735">https://www.ncbi.nlm.nih.gov/assembly/GCA_002849735</a> ]          |

Table S3: Secondary Age Calibrations for Species and Gene Trees

| Phylogeny       | Node                                                               | Upper limit<br>(Ga) | Lower limit<br>(Ga) |
|-----------------|--------------------------------------------------------------------|---------------------|---------------------|
| Species Tree    | Root                                                               | 4.400               | -1                  |
|                 | Crown Chloroflexi                                                  | 3.374               | 2.674               |
|                 | Stem Chloroflexia                                                  | 2.782               | 2.053               |
|                 | Crown Chloroflexia                                                 | 2.041               | 1.645               |
|                 | Common Ancestor of Ktedonobacteria and Dehalococcoidia             | 2.995               | 1.793               |
|                 | Crown Dehalococcoidia                                              | 2.013               | 0.789               |
|                 | Common Ancestor of Anaerolineae and Chloroflexia                   | 3.124               | 2.384               |
| BVMOs Gene Tree | Root                                                               | 3.200               | 1.200               |
|                 | Common Ancestor of <i>SAR202</i> Io17-Chloro-G1 and Casp-Chloro-G4 | 1.623               | 0.988               |
|                 | Common Ancestor of <i>SAR202</i> Io17-Chloro-G6 and Io17-Chloro-G8 | 0.620               | 0.358               |
|                 | Common Ancestor of <i>SAR202</i> Io17-Chloro-G2 and Io17-Chloro-G9 | 0.587               | 0.265               |
|                 | Common Ancestor of <i>SAR202</i> Io17-Chloro-G7 and Casp-Chloro-G2 | 1.083               | 0.721               |
|                 | Common Ancestor of <i>SAR202</i> Io17-Chloro-G6 and Casp-Chloro-G3 | 1.343               | 0.891               |

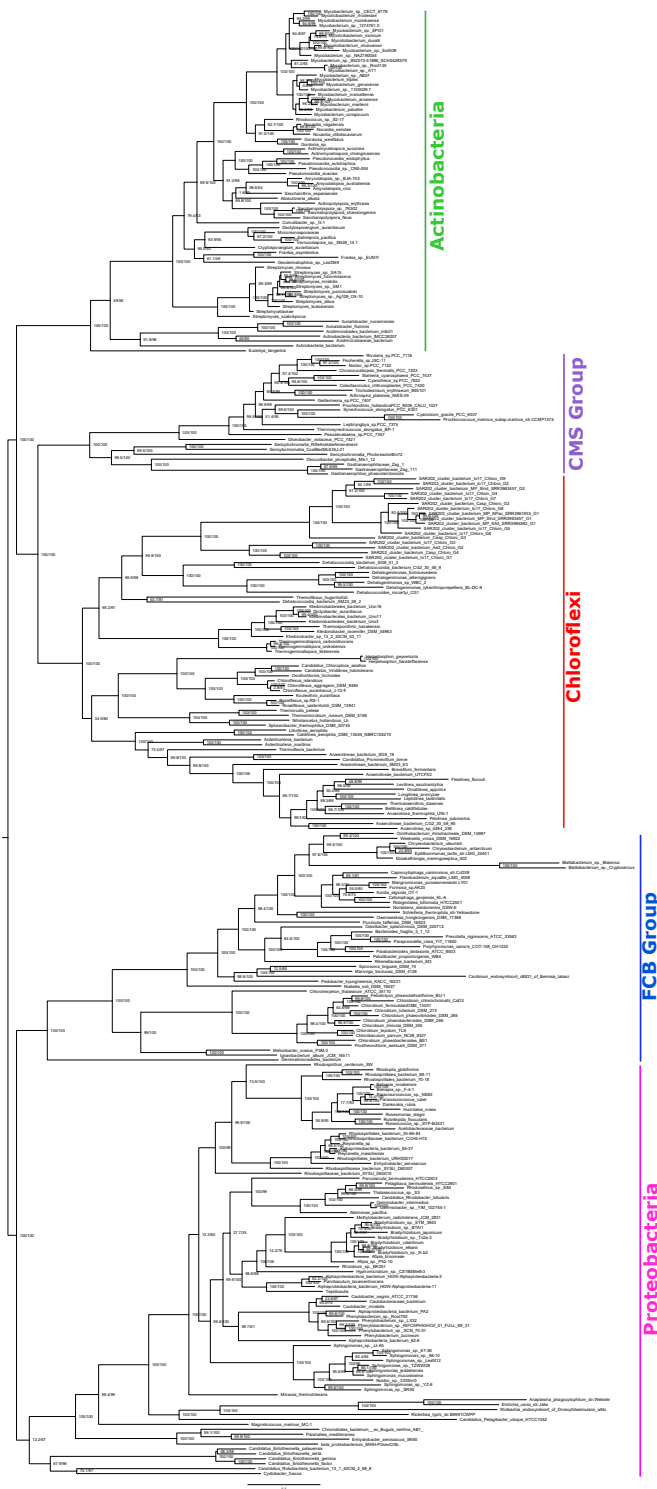

Figure S1: Rooted maximum likelihood species tree of BVMO-containing taxa, including the SAR202 cluster within Chloroflexi. Bipartitions are labeled with percentage support values (approximate likelihood ratio/bootstrap). This tree is manually rooted so that Actinobacteria, Chloroflexi and the CMS (Cyanobacteria-Melainabacteria-Sericytochromatia) group are in one clade while Proteobacteria and the FCB (Fibrobacteres-Chlorobi-Bacteroidete) group are in the other clade (as discussed in the Methods section in the main text).

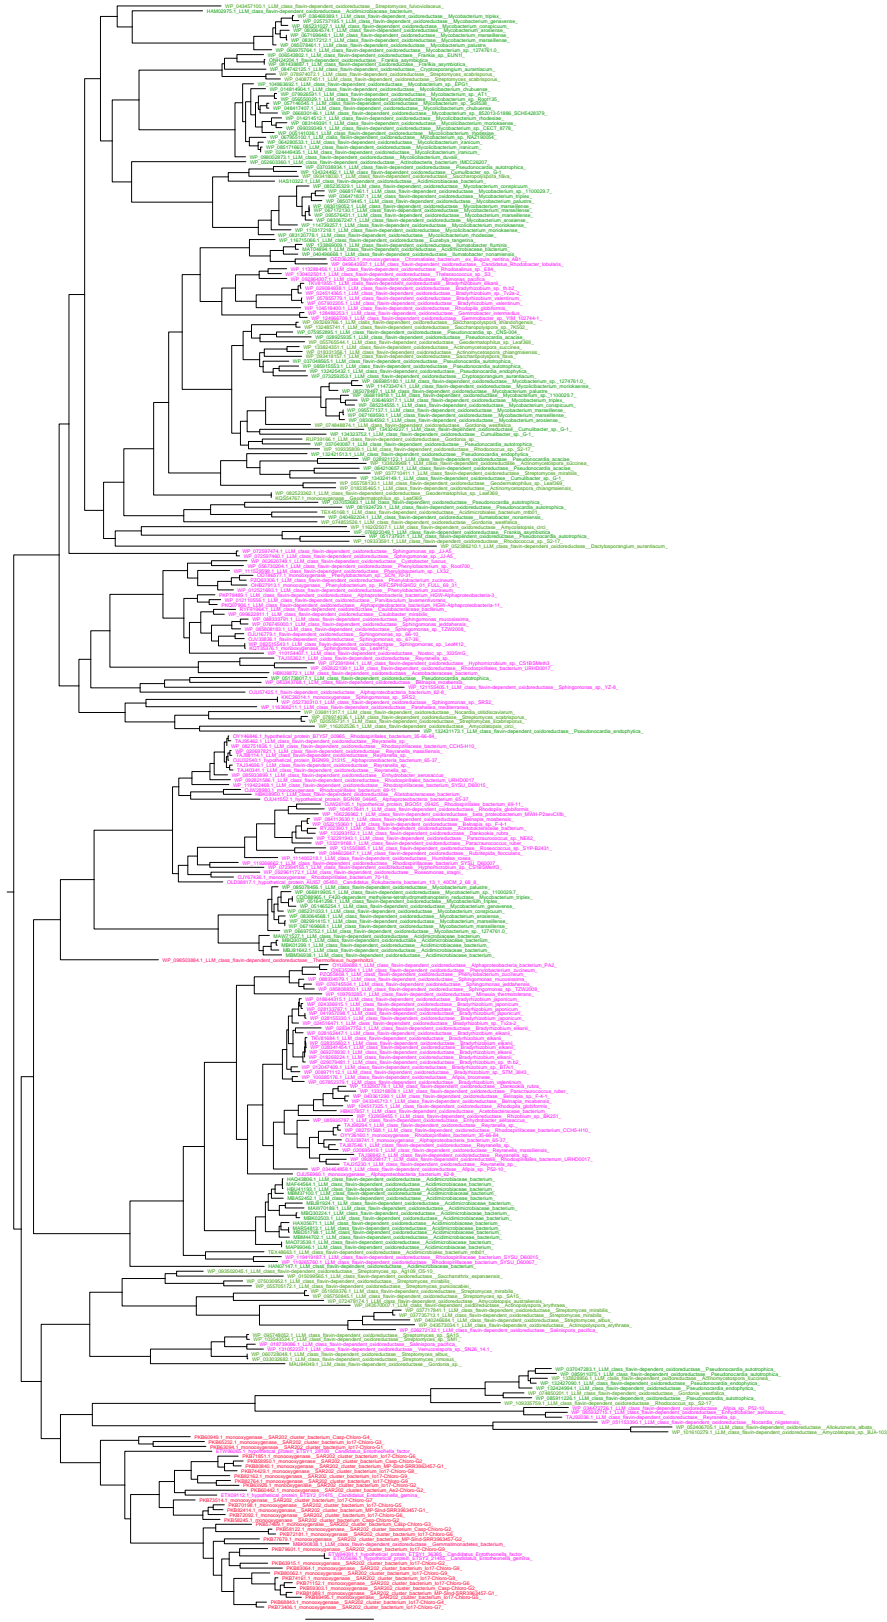

Figure S2: Rooted maximum likelihood tree of BVMO homologs. Bipartitions are labeled with percentage support values (approximate likelihood ratio/bootstrap). This tree is rooted using the minimal ancestor deviation (MAD) method [2] (as discussed in the Methods section in the main text). The taxa names of Chloroflexi, Actinobacteria, and Proteobacteria in the tips of this gene tree are colored in red, green, and neon pink, respectively.

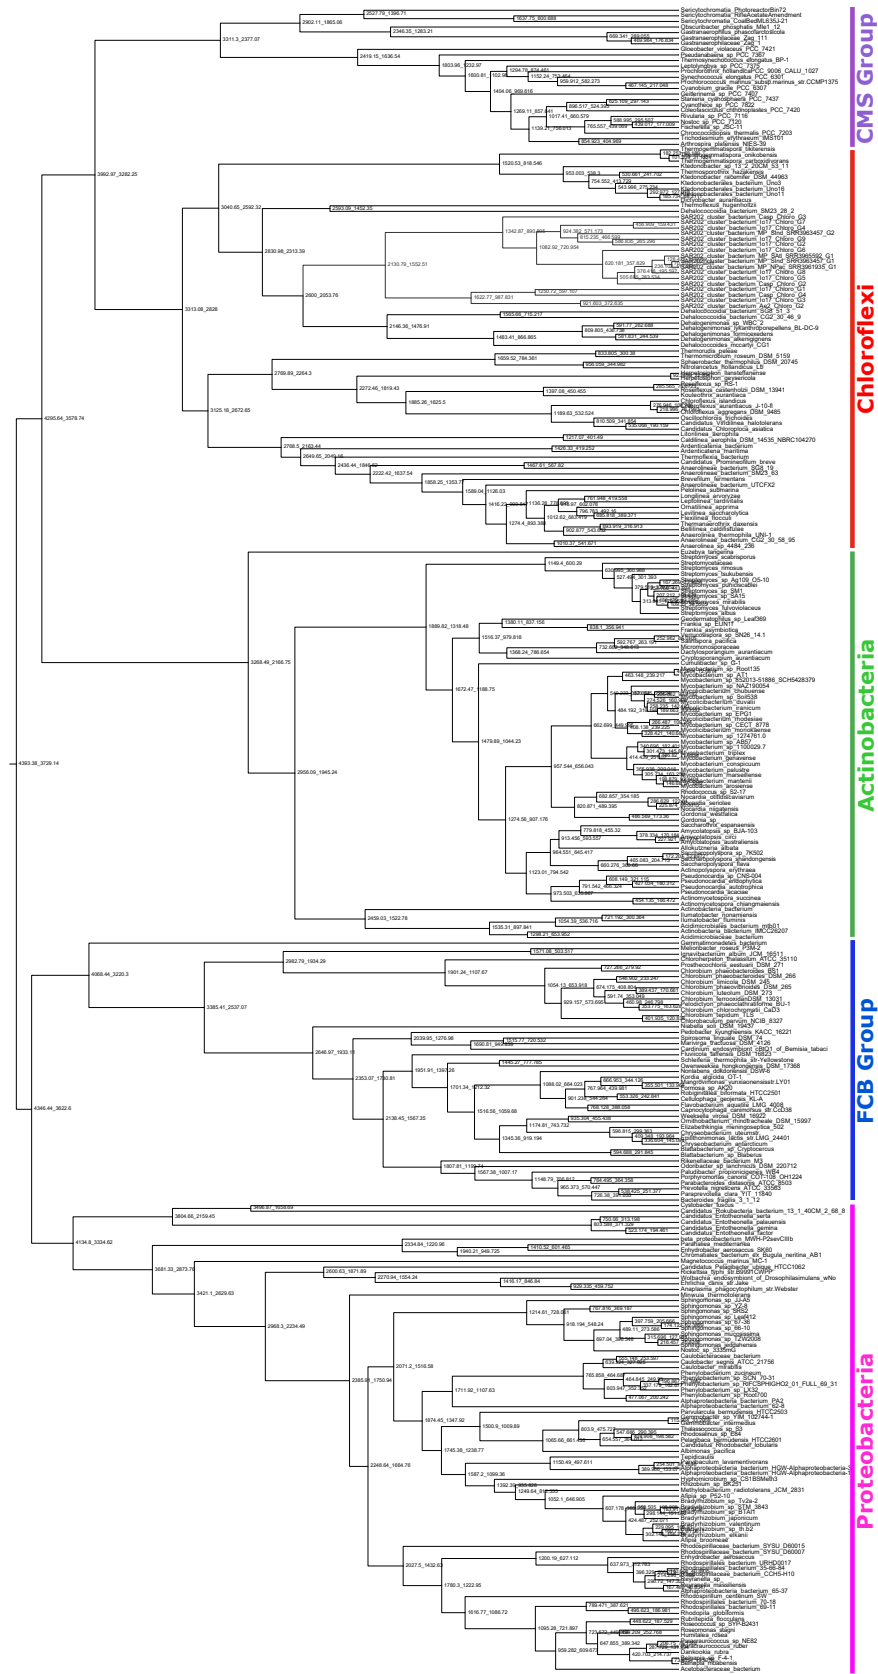

Figure S3: Species tree chronogram of BVMO-containing taxa, including the SAR202 cluster within Chloroflexi. Values on nodes represent 95% confidence intervals of inferred posterior age distributions.

Table S4: The 95% Confidence Intervals for Prior and Posterior Age Values of Representative Nodes on Species Tree

| Node                                                           | Prior               | Posterior           |
|----------------------------------------------------------------|---------------------|---------------------|
| Root of Species Tree                                           | 4.382 Ga – 3.701 Ga | 4.393 Ga – 3.729 Ga |
| Crown Chloroflexi                                              | 3.364 Ga – 2.848 Ga | 3.313 Ga – 2.828 Ga |
| Stem Chloroflexia                                              | 2.751 Ga – 2.234 Ga | 2.770 Ga – 2.264 Ga |
| Crown Chloroflexia                                             | 1.888 Ga – 1.629 Ga | 1.885 Ga – 1.626 Ga |
| Common Ancestor of Classes Ktedonobacteria and Dehalococcoidia | 3.052 Ga – 2.599 Ga | 3.041 Ga – 2.592 Ga |
| Crown Dehalococcoidia                                          | 1.559 Ga – 0.949 Ga | 1.483 Ga – 0.867 Ga |
| Common Ancestor of Classes Anaerolineae and Chloroflexia       | 3.129 Ga – 2.671 Ga | 3.125 Ga – 2.672 Ga |

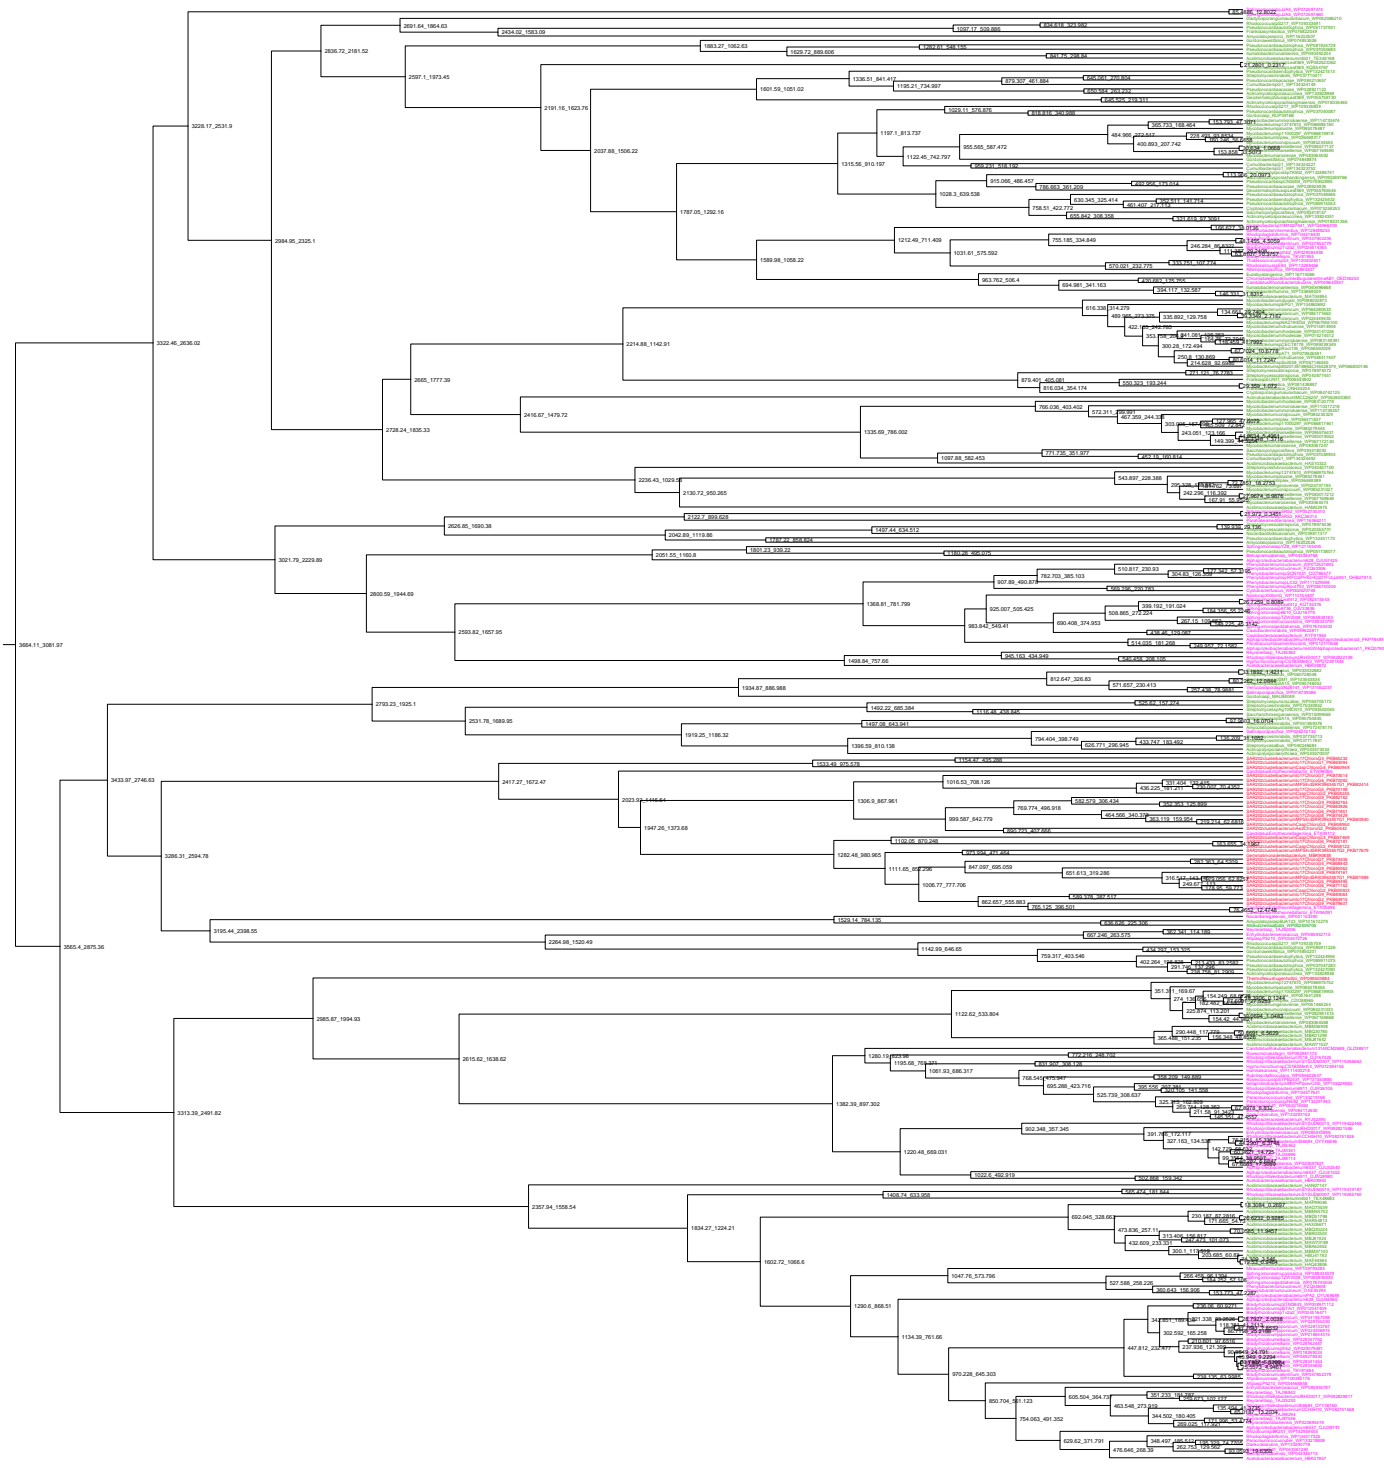

Figure S4: Gene tree chronogram of BVMO homologs. Values on nodes represent 95% confidence intervals of inferred posterior age distributions. The taxa names of Chloroflexi, Actinobacteria, and Proteobacteria in the tips of this gene tree chronogram are colored in red, green, and neon pink, respectively.



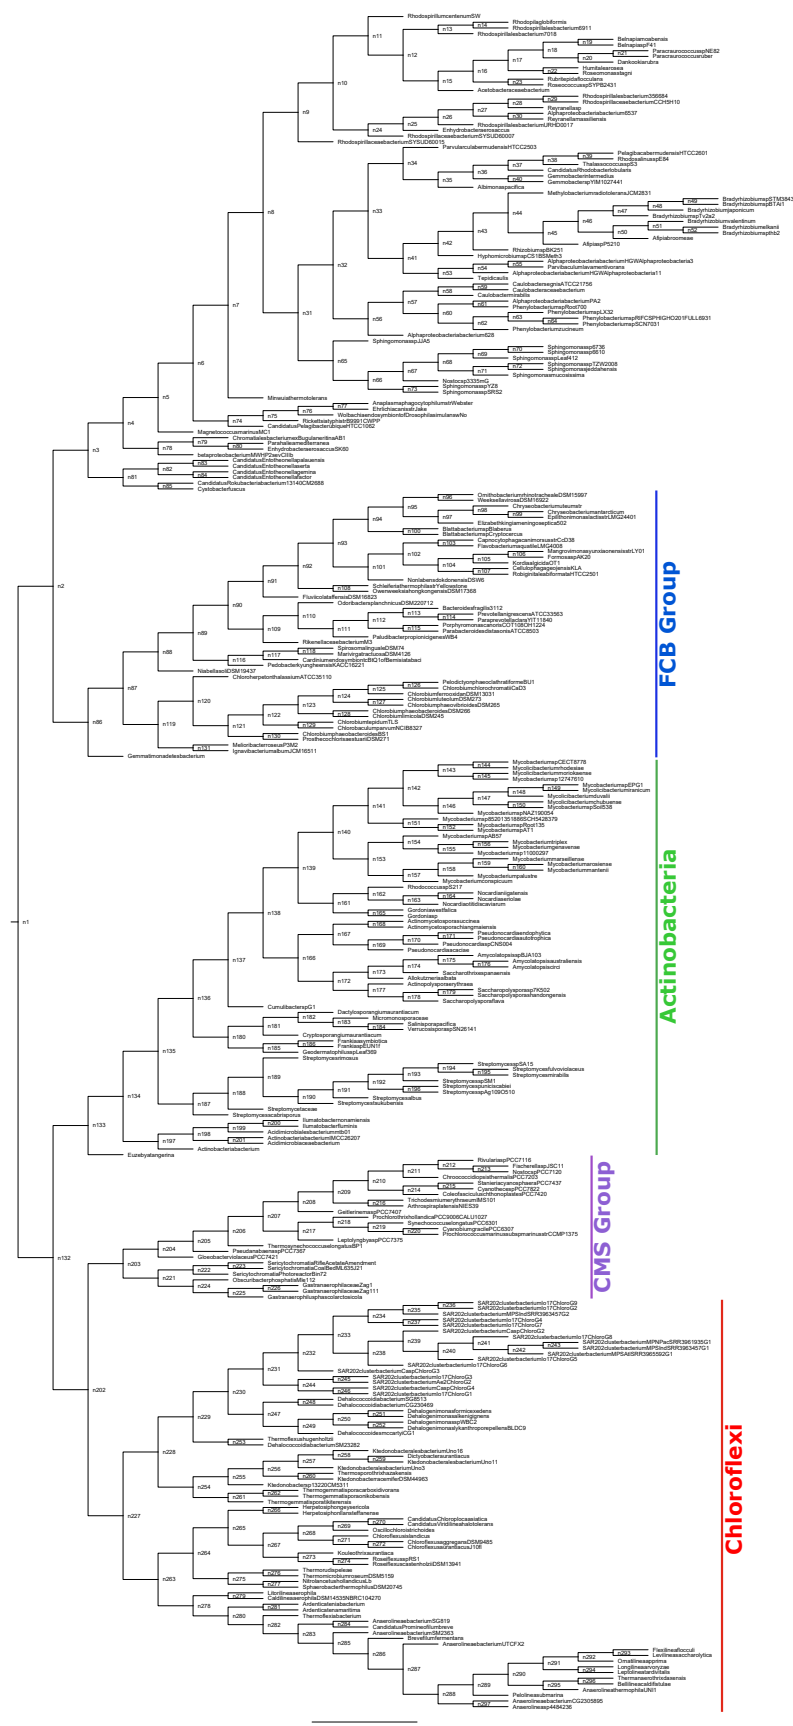

Proteobacteria

FCB Group

Actinobacteria

CMS Group

Chloroflexi

Figure S5: Rooted species tree cladogram with RANGER-DTL nodes mapped (n#).

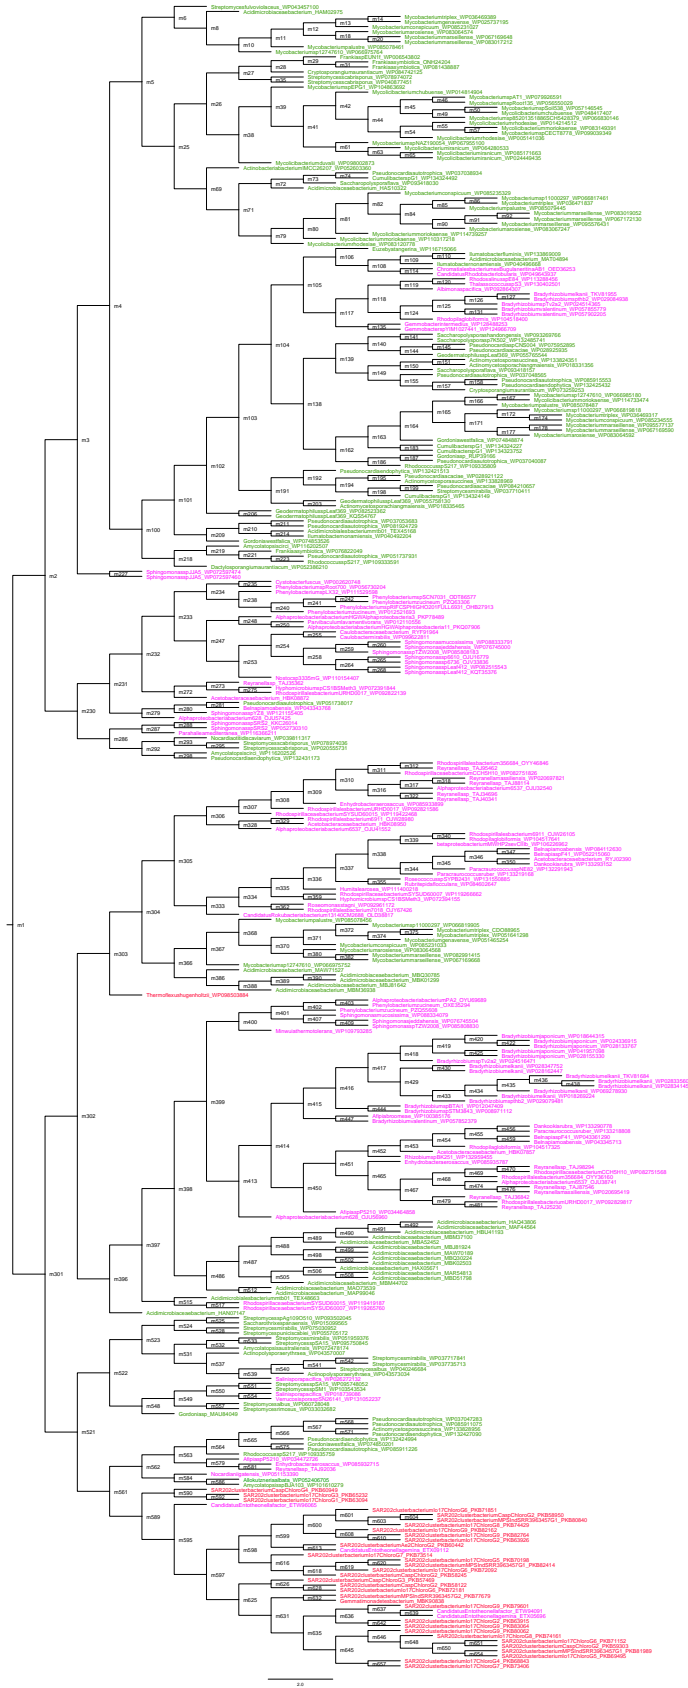

Figure S6: Rooted BVMO homolog tree cladogram with RANGER-DTL nodes mapped (m#). The taxa names of Chloroflexi, Actinobacteria, and Proteobacteria in the tips of this gene tree cladogram are colored in red, green, and neon pink, respectively.

Table S5: Weighted Means and 95% CIs of the Older and Younger Bounds for HGT Events

(Refer to [Figure S5](#) and [Figure S6](#) for the information of node labels "n#" and "m#".)

| HGT ID | Node in Gene Tree | Recipient Branch in Species Tree<br>(older bound, younger bound) | Recipient Weights    | Weighted Mean Ages (Ma)<br>(older bound, younger bound) | 95% CI (Ma)<br>(older bound, younger bound) |
|--------|-------------------|------------------------------------------------------------------|----------------------|---------------------------------------------------------|---------------------------------------------|
| 1      | m561              | (n230, n231)                                                     | 100 %                | (2350.04, 1830.44)                                      | (2598.23 - 2056.45, 2110.15 - 1535.13)      |
| 2      | m3                | (n134, n135)<br>(n136, n180)<br>(n197, n198)                     | 23 %<br>11 %<br>66 % | (2002.70, 1286.83)                                      | (2407.04 - 1616.46, 1552.85 - 1054.73)      |
| 3      | m398              | (n32, n56)                                                       | 100 %                | (1595.38, 1421.68)                                      | (1847.61 - 1341.72, 1703.12 - 1130.51)      |
| 4      | m397              | (n32, n56)                                                       | 100 %                | (1595.38, 1421.68)                                      | (1847.61 - 1341.72, 1703.12 - 1130.51)      |
| 5      | m101              | (n135, n136)<br>(n138, n166)<br>(n198, n199)                     | 73 %<br>13 %<br>14 % | (1465.22, 1268.09)                                      | (1722.05 - 1252.46, 1471.50 - 1078.70)      |
| 6      | m450              | (n9, n10)<br>(n12, n15)<br>(n24, n25)                            | 65 %<br>10 %<br>25 % | (1426.47, 1148.75)                                      | (1659.50 - 1203.30, 1363.03 - 955.47)       |
| 7      | m27               | (n136, n180)                                                     | 100 %                | (1420.51, 1252.02)                                      | (1667.97 - 1201.51, 1506.32 - 984.37)       |
| 8      | m209              | (n198, n199)                                                     | 100 %                | (1188.4, 770.51)                                        | (1570.97 - 892.80, 1068.74 - 583.46)        |
| 9      | m210              | (n198, n199)                                                     | 100 %                | (1188.4, 770.51)                                        | (1570.97 - 892.80, 1068.74 - 583.46)        |
| 10     | m118              | (n34, n35)<br>(n50, n51)                                         | 87 %<br>13 %         | (1106.39, 761.17)                                       | (1320.90 - 907.90, 942.82 - 603.34)         |
| 11     | m452              | (n12, n15)                                                       | 100 %                | (892.13, 764.41)                                        | (1086.88 - 723.66, 957.47 - 608.02)         |
| 12     | m563              | (n24, n25)                                                       | 100 %                | (889.7, 440.02)                                         | (1199.50 - 645.63, 645.03 - 317.33)         |
| 13     | m579              | (n24, n25)                                                       | 100 %                | (889.7, 440.02)                                         | (1199.50 - 645.63, 645.03 - 317.33)         |
| 14     | m626              | (n233, n238)                                                     | 100 %                | (883.07, 473.44)                                        | (1072.91 - 722.48, 617.93 - 358.03)         |
| 15     | m25               | (n147, n148)<br>(n136, n180)<br>(n198, n201)                     | 38 %<br>19 %<br>43 % | (861.00, 719.55)                                        | (1046.02 - 708.32, 898.87 - 566.69)         |
| 16     | m413              | (n44, n45)                                                       | 100 %                | (838.21, 472.71)                                        | (1050.19 - 662.94, 600.62 - 355.46)         |
| 17     | m584              | (n172, n173)                                                     | 100 %                | (800.92, 748.67)                                        | (967.57 - 648.89, 920.87 - 593.96)          |
| 18     | m150              | (n167, n168)                                                     | 100 %                | (797.08, 281.58)                                        | (975.44 - 640.32, 448.32 - 161.99)          |
| 19     | m144              | (n167, n169)                                                     | 100 %                | (797.08, 619.41)                                        | (975.44 - 640.32, 796.96 - 467.36)          |
| 20     | m301              | (n139, n161)                                                     | 100 %                | (794.51, 649.30)                                        | (961.42 - 652.49, 818.11 - 485.25)          |
| 21     | m104              | (n35, n36)<br>(n36, n37)                                         | 76 %<br>24 %         | (793.82, 588.95)                                        | (985.13 - 629.09, 757.10 - 452.10)          |
| 22     | m108              | (n199, n200)                                                     | 100 %                | (770.51, 418.98)                                        | (1068.74 - 538.46, 728.29)                  |
| 23     | m584              | (n252, n253)                                                     | 100 %                | (735.50, 624.62)                                        | (924.00 - 568.82, 807.58 - 466.02)          |
| 24     | m339              | (n13, n14)                                                       | 100 %                | (574.24, 310.48)                                        | (789.73 - 388.53, 493.71 - 185.01)          |

**Continued**

| HGT ID | Node in Gene Tree | Recipient Branch in Species Tree<br>(older bound, younger bound) | Recipient Weights | Weighted Mean Ages (Ma)<br>(older bound, younger bound) | 95% CI (Ma)<br>(older bound, younger bound) |
|--------|-------------------|------------------------------------------------------------------|-------------------|---------------------------------------------------------|---------------------------------------------|
| 25     | m254              | (n57, n58)                                                       | 50 %              | (562.78, 419.13)                                        | (687.26 - 453.97, 532.49 - 329.50)          |
|        |                   | (n67, n68)                                                       | 50 %              |                                                         |                                             |
| 26     | m637              | (n82, n84)                                                       | 100 %             | (562.30, 336.65)                                        | (845.71 - 369.75, 561.40 - 197.73)          |
| 27     | m645              | (n234, n237)                                                     | 90 %              | (558.50, 279.98)                                        | (688.41 - 446.07, 445.74 - 167.27)          |
|        |                   | (n239, n240)                                                     | 10 %              |                                                         |                                             |
| 28     | m333              | (n12, n13)                                                       | 5 %               | (552.2, 377.67)                                         | (686.45 - 442.86, 501.16 - 274.61)          |
|        |                   | (n17, n22)                                                       | 95 %              |                                                         |                                             |
| 29     | m232              | (n25, n26)                                                       | 84 %              | (496.72, 317.45)                                        | (672.75 - 385.20, 418.62 - 248.31)          |
|        |                   | (n56, n57)                                                       | 4 %               |                                                         |                                             |
|        |                   | (n57, n60)                                                       | 2 %               |                                                         |                                             |
|        |                   | (n66, n67)                                                       | 10 %              |                                                         |                                             |
| 30     | m336              | (n13, n14)                                                       | 7 %               | (470.75, 255.35)                                        | (581.22 - 377.09, 357.08 - 176.56)          |
|        |                   | (n20, n21)                                                       | 28 %              |                                                         |                                             |
|        |                   | (n16, n23)                                                       | 65 %              |                                                         |                                             |
| 31     | m140              | (n167, n169)                                                     | 31 %              | (466.12, 256.36)                                        | (596.10 - 364.73, 329.92 - 197.61)          |
|        |                   | (n178, n179)                                                     | 69 %              |                                                         |                                             |
| 32     | m337              | (n13, n14)                                                       | 17 %              | (460.79, 251.41)                                        | (566.36 - 368.23, 343.86 - 179.92)          |
|        |                   | (n13, n14)                                                       | 30 %              |                                                         |                                             |
|        |                   | (n13, n14)                                                       | 53 %              |                                                         |                                             |
| 33     | m564              | (n170, n171)                                                     | 100 %             | (445.86, 286.04)                                        | (601.87 - 323.96, 419.72 - 178.85)          |
| 34     | m157              | (n170, n171)                                                     | 100 %             | (445.86, 286.04)                                        | (601.87 - 323.96, 419.72 - 178.85)          |
| 35     | m272              | (n25, n26)                                                       | 100 %             | (440.02, 282.48)                                        | (645.03 - 317.33, 394.78 - 205.80)          |
| 36     | m247              | (n54, n55)                                                       | 89 %              | (423.82, 194.93)                                        | (537.54 - 321.19, 295.40 - 131.38)          |
|        |                   | (n66, n67)                                                       | 11 %              |                                                         |                                             |
| 37     | m550              | (n183, n184)                                                     | 100 %             | (402.76, 150.48)                                        | (606.92 - 263.68, 253.39 - 87.56)           |
| 38     | m41               | (n143, n144)                                                     | 32 %              | (401.49, 292.86)                                        | (491.68 - 329.52, 384.50 - 210.74)          |
|        |                   | (n141, n151)                                                     | 68 %              |                                                         |                                             |
| 39     | m71               | (n142, n143)                                                     | 100 %             | (394.41, 315.27)                                        | (483.9 - 314.88, 405.16 - 235.75)           |
| 40     | m646              | (n239, n240)                                                     | 100 %             | (381.51, 274.13)                                        | (505.97 - 281.41, 376.26 - 195.07)          |
| 41     | m619              | (n239, n240)                                                     | 100 %             | (381.51, 274.13)                                        | (505.97 - 281.41, 376.26 - 195.07)          |
| 42     | m44               | (n143, n144)                                                     | 50 %              | (378.21, 261.97)                                        | (467.66 - 307.59, 338.86 - 192.30)          |
|        |                   | (n141, n151)                                                     | 50 %              |                                                         |                                             |
| 43     | m42               | (n143, n144)                                                     | 45 %              | (372.12, 253.89)                                        | (460.37 - 301.44, 329.70 - 184.75)          |
|        |                   | (n141, n151)                                                     | 55 %              |                                                         |                                             |
| 44     | m117              | (n36, n40)                                                       | 63 %              | (371.07, 123.28)                                        | (452.61 - 294.37, 167.32 - 86.79)           |
|        |                   | (n50, n51)                                                       | 37 %              |                                                         |                                             |
| 45     | m401              | (n68, n71)                                                       | 100 %             | (365.38, 206.57)                                        | (482.37 - 277.32, 311.30 - 124.05)          |

**Continued**

| HGT ID | Node in Gene Tree | Recipient Branch in Species Tree<br>(older bound, younger bound) | Recipient Weights | Weighted Mean Ages (Ma)<br>(older bound, younger bound) | 95% CI (Ma)<br>(older bound, younger bound) |
|--------|-------------------|------------------------------------------------------------------|-------------------|---------------------------------------------------------|---------------------------------------------|
| 46     | m26               | (n147, n148)<br>(n136, n180)                                     | 88 %<br>12 %      | (361.39, 326.84)                                        | (430.74 - 299.20, 397.26 - 265.15)          |
| 47     | m81               | (n153, n157)                                                     | 100 %             | (323.05, 280.01)                                        | (408.56 - 252.13, 362.58 - 209.57)          |
| 48     | m338              | (n13, n14)<br>(n20, n21)                                         | 32 %<br>68 %      | (317.05, 186.08)                                        | (406.19 - 233.81, 261.19 - 125.20)          |
| 49     | m166              | (n143, n145)                                                     | 100 %             | (315.27, 225.34)                                        | (405.16 - 235.75, 333.62 - 141.45)          |
| 50     | m345              | (n18, n19)                                                       | 100 %             | (302.11, 40.09)                                         | (413.53 - 214.94, 74.22 - 20.40)            |
| 51     | m548              | (n190, n191)                                                     | 100 %             | (286.33, 234.65)                                        | (380.13 - 219.53, 305.71 - 179.41)          |
| 52     | m304              | (n157, n158)                                                     | 100 %             | (280.01, 224.98)                                        | (362.58 - 209.57, 306.73 - 164.28)          |
| 53     | m10               | (n157, n158)                                                     | 100 %             | (280.01, 224.98)                                        | (362.58 - 209.57, 306.73 - 164.28)          |
| 54     | m164              | (n157, n158)                                                     | 100 %             | (280.01, 224.98)                                        | (362.58 - 209.57, 306.73 - 164.28)          |
| 55     | m8                | (n157, n158)                                                     | 100 %             | (280.01, 224.98)                                        | (362.58 - 209.57, 306.73 - 164.28)          |
| 56     | m85               | (n154, n155)                                                     | 100 %             | (253.41, 215.05)                                        | (336.94 - 183.83, 300.24 - 149.42)          |
| 57     | m370              | (n154, n155)                                                     | 100 %             | (253.41, 215.05)                                        | (336.95 - 183.83, 300.24 - 149.42)          |
| 58     | m371              | (n154, n155)                                                     | 100 %             | (253.41, 215.05)                                        | (336.95 - 183.83, 300.24 - 149.42)          |
| 59     | m171              | (n154, n155)                                                     | 100 %             | (253.41, 215.05)                                        | (336.95 - 183.83, 300.24 - 149.42)          |
| 60     | m240              | (n63, n64)                                                       | 100 %             | (236.98, 122.65)                                        | (335.45 - 161.76, 207.89 - 74.34)           |
| 61     | m522              | (n191, n192)                                                     | 100 %             | (234.65, 187.77)                                        | (305.71 - 179.41, 247.87 - 142.50)          |
| 62     | m124              | (n50, n51)                                                       | 100 %             | (220.84, 159.53)                                        | (302.13 - 159.01, 226.52 - 106.21)          |
| 63     | m13               | (n155, n156)                                                     | 100 %             | (215.05, 120.26)                                        | (300.24 - 149.42, 190.65 - 72.60)           |
| 64     | m12               | (n155, n156)                                                     | 100 %             | (215.05, 120.26)                                        | (300.24 - 149.42, 190.65 - 72.60)           |
| 65     | m316              | (n27, n30)                                                       | 100 %             | (210.31, 94.52)                                         | (297.65 - 148.08, 170.15 - 47.31)           |
| 66     | m309              | (n27, n28)                                                       | 100 %             | (210.31, 145.90)                                        | (297.65 - 148.08, 216.72 - 98.91)           |
| 67     | m49               | (n147, n150)                                                     | 100 %             | (210.09, 146.05)                                        | (273.32 - 156.01, 204.35 - 97.78)           |
| 68     | m417              | (n51, n52)                                                       | 100 %             | (159.5, 102.61)                                         | (226.52 - 106.21, 161.07 - 61.26)           |

Table S6: Direction of HGT Events

| HGT ID | Phylum of HGT Donor | Phylum of HGT Recipient |
|--------|---------------------|-------------------------|
| 1      | Actinobacteria      | Chloroflexi             |
| 2      | Proteobacteria      | Actinobacteria          |
| 3      | Actinobacteria      | Proteobacteria          |
| 4      | Proteobacteria      | Proteobacteria          |
| 5      | Actinobacteria      | Actinobacteria          |
| 6      | Proteobacteria      | Proteobacteria          |
| 7      | Actinobacteria      | Actinobacteria          |
| 8      | Actinobacteria      | Actinobacteria          |
| 9      | Actinobacteria      | Actinobacteria          |
| 10     | Proteobacteria      | Proteobacteria          |
| 11     | Proteobacteria      | Proteobacteria          |
| 12     | Actinobacteria      | Proteobacteria          |
| 13     | Proteobacteria      | Proteobacteria          |
| 14     | Chloroflexi         | Chloroflexi             |
| 15     | Actinobacteria      | Actinobacteria          |
| 16     | Proteobacteria      | Proteobacteria          |
| 17     | Actinobacteri       | Actinobacteria          |
| 18     | Actinobacteria      | Actinobacteria          |
| 19     | Actinobacteria      | Actinobacteria          |
| 20     | Proteobacteria      | Actinobacteria          |
| 21     | Actinobacteria      | Proteobacteria          |
| 22     | Proteobacteria      | Actinobacteria          |
| 23     | Actinobacteria      | Actinobacteria          |
| 24     | Proteobacteria      | Proteobacteria          |
| 25     | Proteobacteria      | Proteobacteria          |
| 26     | Chloroflexi         | Proteobacteria          |
| 27     | Chloroflexi         | Chloroflexi             |
| 28     | Proteobacteria      | Proteobacteria          |
| 29     | Proteobacteria      | Proteobacteria          |
| 30     | Proteobacteria      | Proteobacteria          |
| 31     | Actinobacteria      | Actinobacteria          |
| 32     | Proteobacteria      | Proteobacteria          |
| 33     | Actinobacteria      | Actinobacteria          |
| 34     | Actinobacteria      | Actinobacteria          |
| 35     | Proteobacteria      | Proteobacteria          |
| 36     | Proteobacteria      | Proteobacteria          |
| 37     | Actinobacteria      | Actinobacteria          |
| 38     | Actinobacteria      | Actinobacteria          |
| 39     | Actinobacteria      | Actinobacteria          |
| 40     | Chloroflexi         | Chloroflexi             |
| 41     | Chloroflexi         | Chloroflexi             |
| 42     | Actinobacteria      | Actinobacteria          |
| 43     | Actinobacteria      | Actinobacteria          |
| 44     | Proteobacteria      | Proteobacteria          |
| 45     | Proteobacteria      | Proteobacteria          |
| 46     | Actinobacteria      | Actinobacteria          |
| 47     | Actinobacteria      | Actinobacteria          |
| 48     | Proteobacteria      | Proteobacteria          |

**Continued**

| HGT ID | Phylum of HGT Donor | Phylum of HGT Recipient |
|--------|---------------------|-------------------------|
| 49     | Actinobacteria      | Actinobacteria          |
| 50     | Proteobacteria      | Proteobacteria          |
| 51     | Actinobacteria      | Actinobacteria          |
| 52     | Proteobacteria      | Actinobacteria          |
| 53     | Actinobacteria      | Actinobacteria          |
| 54     | Actinobacteria      | Actinobacteria          |
| 55     | Actinobacteria      | Actinobacteria          |
| 56     | Actinobacteria      | Actinobacteria          |
| 57     | Actinobacteria      | Actinobacteria          |
| 58     | Actinobacteria      | Actinobacteria          |
| 59     | Actinobacteria      | Actinobacteria          |
| 60     | Proteobacteria      | Proteobacteria          |
| 61     | Actinobacteria      | Actinobacteria          |
| 62     | Proteobacteria      | Proteobacteria          |
| 63     | Actinobacteria      | Actinobacteria          |
| 64     | Actinobacteria      | Actinobacteria          |
| 65     | Proteobacteria      | Proteobacteria          |
| 66     | Proteobacteria      | Proteobacteria          |
| 67     | Actinobacteria      | Actinobacteria          |
| 68     | Proteobacteria      | Proteobacteria          |

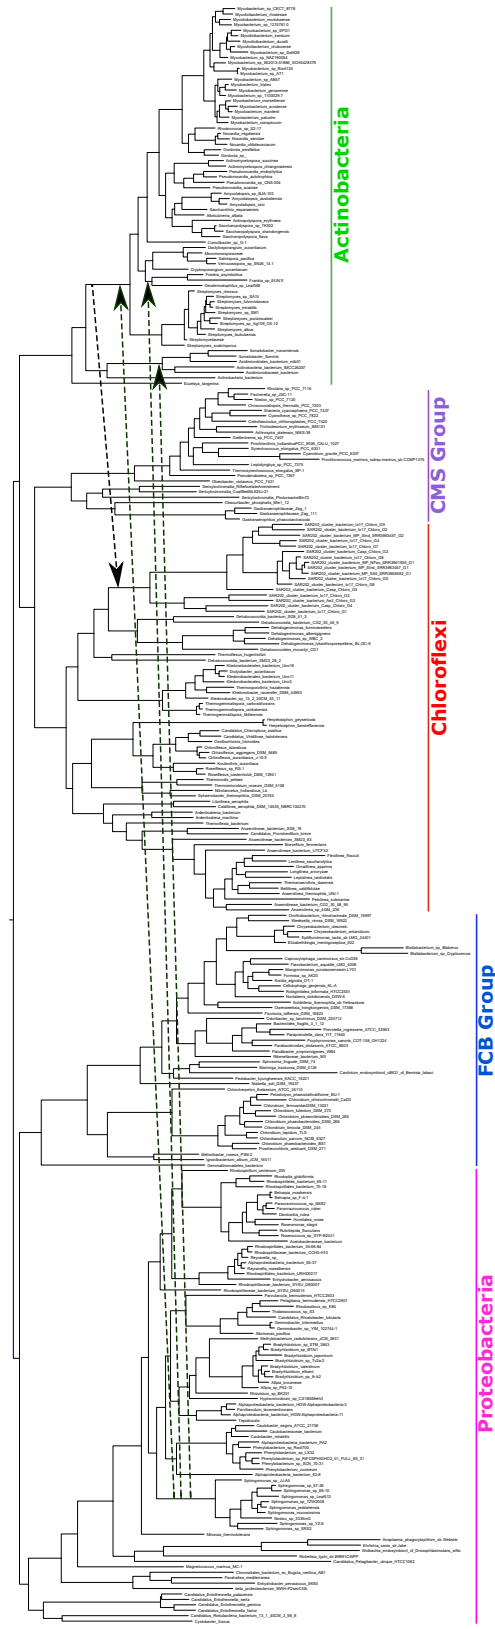

Figure S7: HGT events whose older bounds are older than 2000 Ma. The HGT event from Actinobacteria to Chloroflexi is HGT #1 in Table S5. The HGT events from Proteobacteria to Actinobacteria are HGT #2 in Table S5.



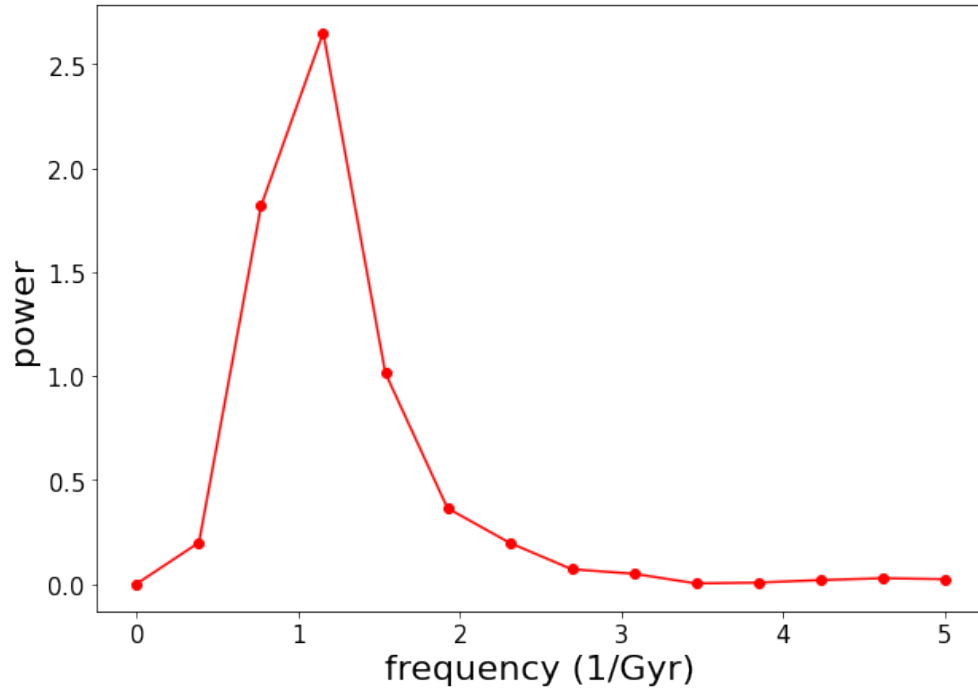

Figure S8: The power spectrum for the fluctuations  $x_i$  [equation (12) in the Methods section], using the SAR202 BVMO diversification rates. The probability that a randomly branching gene tree would yield a spectrum with such a sharp peak is  $p < 0.01$ .

**a**

| Alignment Coverage                                                                                                                                                                              | 3D Model                                                                          | Confidence | % i.d. | Template Information                                                                                                                                                                                                                                                                                                                                                                                                                            |
|-------------------------------------------------------------------------------------------------------------------------------------------------------------------------------------------------|-----------------------------------------------------------------------------------|------------|--------|-------------------------------------------------------------------------------------------------------------------------------------------------------------------------------------------------------------------------------------------------------------------------------------------------------------------------------------------------------------------------------------------------------------------------------------------------|
| 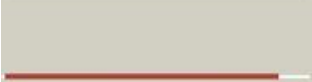<br>Alignment<br>Residues 6-346 of your sequence aligned (87% coverage). Click to view detailed alignment info |  | 100.0      | 26     | <b>PDB header:</b> oxidoreductase<br><b>Chain:</b> A: <b>PDB Molecule:</b> 3,6-diketocamphane 1,6 monooxygenase;<br><b>PDBTitle:</b> type ii baeyer-villiger monooxygenase oxygenating2 constituent of 3,6-diketocamphane 1,6 monooxygenase from3 pseudomonas putida<br><b>PDB Entry:</b> <a href="#">PDBe</a> <a href="#">RCSB</a> <a href="#">PDBj</a><br> |

**b**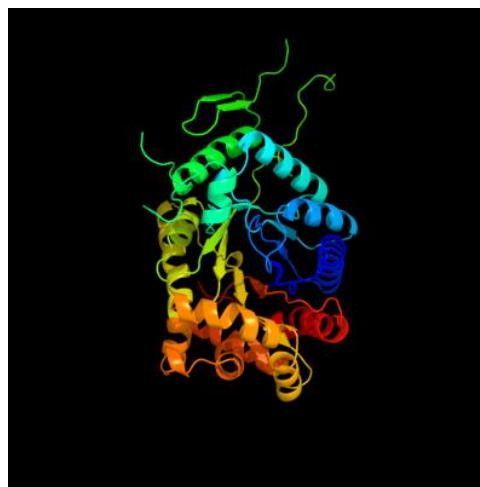

Figure S9: (a) A Phyre model [3] of BVMO. The confidence and coverage in the model are 100% and 87%, respectively. This means that 87% of the sequence has been modelled with 100% confidence by the template of a Type II Baeyer-Villiger monooxygenase. (b) A three-dimensional model of the Type II Baeyer-Villiger monooxygenase template.

## References

- [1] Soo, R. M., Hemp, J., Parks, D. H., Fischer, W. W. & Hugenholtz, P. On the origins of oxygenic photosynthesis and aerobic respiration in Cyanobacteria. *Science* **355**, 1436–1440 (2017).
- [2] Tria, F. D. K., Landan, G. & Dagan, T. Phylogenetic rooting using minimal ancestor deviation. *Nature Ecology & Evolution* **1**, 1–7 (2017).
- [3] Kelley, L. A., Mezulis, S., Yates, C. M., Wass, M. N. & Sternberg, M. J. The Phyre2 web portal for protein modeling, prediction and analysis. *Nature Protocols* **10**, 845 (2015).
