# Supplementary material for: Oxidative metabolisms catalyzed Earth’s oxygenation
Source: PubMed Central journal article supplement (PMC8921266; doi:10.1038/s41467-022-28996-0), 2022-03-14
Supplement: 41467_2022_28996_MOESM3_ESM.pdf [file 41467_2022_28996_MOESM3_ESM.pdf]

### **Description of Additional Supplementary Files**

File Name: Supplementary Data 1

Description: Aligned Sequences for Species Tree.fasta

File Name: Supplementary Data 2

Description: Aligned Sequences for Gene Tree.fasta

File Name: Supplementary Data 3

Description: Rooted Species Tree.treefile

File Name: Supplementary Data 4

Description: Rooted Gene Tree.treefile

File Name: Supplementary Data 5

Description: Rooted Species Tree.chronogram

File Name: Supplementary Data 6

Description: Rooted Gene Tree.chronogram
